# Supplementary material for: Natural selection links immune-gene variation to blood virome burden in indigenous Orang Asli from tropical Southeast Asia
Source: Research Square preprint supplement (doi:10.21203/rs.3.rs-8552878/v1), 2026-01-21
Supplement: Supplementary file 1 [file 672ed1405b7226fdcdd17076.xlsx]

## Sheet: Table S1
Table S1. Comparison of physical features, protein interaction, evolutionary features among four gene categries. Values shown in red represent the highest values in the comparisons, while values shown in blue represent the results of immune gene category.
Category	Gene Length (Mean ± SEM)	CDS (Mean ± SEM)	Transcript count (Mean ± SEM)	5'-UTR (Mean ± SEM)	3'-UTR (Mean ± SEM)
Immune	97325.81 ± 7179.79	1287.71 ± 49.74	11.72 ± 0.62	132.84 ± 4.98	962.59 ± 54.51
MC	77797.34 ± 5094.91	1647.34 ± 187.26	14.88 ± 0.73	128.74 ± 5.04	757.12 ± 37.47
Essential	40286.12 ± 2139.85	1130.97 ± 49.32	12.77 ± 0.56	107.94 ± 4.17	688.88 ± 39.05
Random	45871.35 ± 3022.31	1089.55 ± 39.27	7.73 ± 0.35	135.66 ± 7.32	927.00 ± 49.71
Category	Protein_interaction_count (Mean ± SEM)	Protein_interaction_ratio (Mean ± SEM)
Immune	12.459 ± 1.775	0.0890% ± 0.0180%
MC	10.184 ± 1.330	0.0777% ± 0.151%
Essential	9.780 ± 1.133	0.0869% ± 0.146%
Random	15.118 ± 1.991	0.3729% ± 0.188%
Category	Fst (Mean ± SEM)	CHB_iHS_combine_all (Mean ± SEM)	CHB_iHS_combine_top1% (Mean ± SEM)	Tajimas'D (Mean ± SEM)	Het_density (Mean ± SEM)
Immune	-0.01781 ± 0.00128	0.01195 ± 0.00338	0.10650 ± 0.02714	-0.4684 ± 0.0147	0.000642264 ± 2.50E-06
MC	-0.00369 ± 0.00088	0.01035 ± 0.00273	0.06473 ± 0.01580	-0.4717 ± 0.0168	0.000644333 ± 2.43E-06
Essential	-0.04502 ± 0.00134	0.00808 ± 0.00214	0.09672 ± 0.02129	-0.7208 ± 0.0265	0.000531118 ± 2.98E-06
Random	0.00392 ± 0.00099	0.00085 ± 0.00078	/	-0.4771 ± 0.0238	0.000618493 ± 2.91E-06
Population_pair	whole autosome Fst background (Mean ± SD)
CHB_CEU	0.0230 ± 0.0525
CHB_YRI	0.0187 ± 0.0386
CEU_YRI	0.0325 ± 0.0617

## Sheet: Table S2
Table S2. Comparison of immune gene evolutionary statistics between indigenous and non-indigenous populations across continents.
Sample information and sample sizes for indigenous and non-indigenous population comparisons
Type	Region	Population	Sample Size
Indigenous	Africa	Mozabite	26
Indigenous	Africa	Mbuti	12
Non-indigenous	Africa	YRI	108
Indigenous	America	Maya	19
Indigenous	America	Pima	14
Non-indigenous	America	PEL	85
Indigenous	EastAsia	Miao	10
Indigenous	EastAsia	Tujia	10
Non-indigenous	EastAsia	CHB	103
Non-indigenous	EastAsia	KHV	99
Indigenous	Southeast Asia	Orang Asli	39
Indigenous	SouthAsia	Burusho	24
Indigenous	SouthAsia	Kalash	21
Non-indigenous	SouthAsia	PJL	96
Indigenous	Oceania	NAN_Melanesian	11
Indigenous	Oceania	Papuan	11
Non-indigenous	Europe	CEU	99
Comparison of immune gene heterozygosity density between indigenous and non-indigenous populations across continents
Type	Region	Population	Het_density Median
Indigenous	Africa	Mozabite*	0.1739
Indigenous	Africa	Mbuti	0.1557
Non-indigenous	Africa	YRI*	0.1702
Indigenous	America	Maya*	0.154
Indigenous	America	Pima	0.1414
Non-indigenous	America	PEL*	0.161
Indigenous	East Asia	Miao	0.1736
Indigenous	East Asia	Tujia	0.1752
Non-indigenous	East Asia	CHB*	0.1747
Non-indigenous	East Asia	KHV*	0.1747
Indigenous	Southeast Asia	Orang Asli*	0.1693
Indigenous	South Asia	Burusho*	0.1787
Indigenous	South Asia	Kalash*	0.1681
Non-indigenous	South Asia	PJL*	0.1783
Indigenous	Oceania	NAN_Melanesian	0.152
Indigenous	Oceania	Papuan	0.1368
Non-indigenous	Europe	CEU*	0.1686
An asterisk (*) indicates populations with >16 individuals; Het_density was estimated using 30 random subsamples of 16 individuals (median).
Comparison of immune gene Tjimas'D between indigenous and non-indigenous populations across super-continents
Type	Region	Immune_Gene_TajimasD
Indigenous	Africa	-0.822005
Non-indigenous	Africa	-0.755304
Indigenous	America	-0.0066123
Non-indigenous	America	-0.610929
Indigenous	Asia	-0.63672
Non-indigenous	Asia	-1.18544
Non-indigenous	Europe	-0.263926
Indigenous	Oceania	0.105333
Comparison of immune gene Tajimas'D between indigenous and non-indigenous populations across continents
Type	Region	Population	Immune_Gene_Tajimas'D
Indigenous	Africa	Mozabite	-0.290688
Indigenous	Africa	Mbuti	-0.217585
Non-indigenous	Africa	YRI	-0.755304
Indigenous	America	Maya	0.132563
Indigenous	America	Pima	0.640194
Non-indigenous	America	PEL	-0.610929
Indigenous	EastAsia	Miao	0.152416
Indigenous	EastAsia	Tujia	0.122867
Non-indigenous	EastAsia	CHB	-0.424651
Non-indigenous	EastAsia	KHV	-0.408896
Indigenous	Southeast Asia	Orang Asli	0.614472
Indigenous	SouthAsia	Burusho	-0.00204781
Indigenous	SouthAsia	Kalash	0.466168
Non-indigenous	SouthAsia	PJL	-0.467764
Indigenous	Oceania	NAN_Melanesian	0.266718
Indigenous	Oceania	Papuan	0.13567
Non-indigenous	Europe	CEU	-0.263926

## Sheet: Table S3
Table S3. Annotation Summary of Signal SNPs with Moderate and Low Impact.
Uploaded_variation	Location	Allele	Gene	Feature	Feature_type	Consequence	cDNA_position	CDS_position	Protein_position	Amino_acids	Codons	Existing_variation	Ref_allele	Impact	Strand	Symbol	Symbol_source	HGNC_ID	Biotype	Gene_pheno	Nearest	Sift	PolyPhen	Clin_sig	Somatic	Pheno	LoFtool	CADD_phred	CADD_raw	Condel	GERP
rs7498665	chr16:28871920	G	ENSG00000178188	ENST00000684370	Transcript	missense_variant	3702	1450	484	T/A	Aca/Gca	rs7498665,CM0910248,COSV59461486	A	MODERATE	1	SH2B1	HGNC	HGNC:30417	protein_coding	1	ENST00000569651	tolerated(1)	benign(0)	benign	0,0,1	1,1,1	0.667	12.82	1.1046	neutral(0.000)	-
rs2904880	chr16:28933075	G	ENSG00000177455	ENST00000538922	Transcript	missense_variant	550	520	174	L/V	Ctc/Gtc	rs2904880,COSV61188398	C	MODERATE	1	CD19	HGNC	HGNC:1633	protein_coding	1	ENST00000538922	tolerated_low_confidence(0.18)	benign(0)	benign	0,1	1,1	0.411	3.604	0.241436	neutral(0.056)	-
rs140494095	chr18:45954662	A	ENSG00000152223	ENST00000282041	Transcript	missense_variant	830	740	247	P/L	cCg/cTg	rs140494095,COSV56346434	G	MODERATE	-1	EPG5	HGNC	HGNC:29331	protein_coding	1	ENST00000696489	deleterious(0.04)	possibly_damaging(0.766)	benign	0,1	1,1	-	26	3.83597	deleterious(0.633)	1.97
rs4823054	chr22:29802036	T	ENSG00000100325	ENST00000307790	Transcript	missense_variant	1640	1526	509	R/Q	cGg/cAg	rs4823054,COSV57073346	C	MODERATE	-1	ASCC2	HGNC	HGNC:24103	protein_coding	-	ENST00000411532	deleterious(0.04)	benign(0.434)	-	0,1	0,1	0.652	24.1	3.30611	deleterious(0.490)	2.72
rs3747203	chr22:43735906	C	ENSG00000186976	ENST00000262726	Transcript	missense_variant	877	595	199	R/G	Agg/Ggg	rs3747203,COSV53064464	T	MODERATE	-1	EFCAB6	HGNC	HGNC:24204	protein_coding	-	ENST00000396231	deleterious(0)	possibly_damaging(0.629)	-	0,1	0,1	0.982	21.9	2.36877	deleterious(0.664)	-4.21
rs492594	chr2:168907666	C	ENSG00000152254	ENST00000375363	Transcript	missense_variant	696	655	219	V/L	Gtt/Ctt	rs492594,CM151239,COSV56371655	G	MODERATE	1	G6PC2	HGNC	HGNC:28906	protein_coding	-	ENST00000451987	tolerated(1)	benign(0)	-	0,0,1	1,1,1	0.623	10.3	0.88782	neutral(0.000)	-
rs2291089	chr3:124796789	T	ENSG00000082781	ENST00000296181	Transcript	missense_variant	1657	1292	431	R/Q	cGa/cAa	rs2291089,COSV56150346	C	MODERATE	-1	ITGB5	HGNC	HGNC:6160	protein_coding	-	ENST00000481591	tolerated(0.09)	possibly_damaging(0.861)	-	0,1	0,1	0.0949	23.3	2.94884	deleterious(0.629)	3.56
rs67437265	chr4:71022523	T	ENSG00000156136	ENST00000286648	Transcript	missense_variant	551	364	122	P/S	Cct/Tct	rs67437265,CM076146,COSV54378576	C	MODERATE	1	DCK	HGNC	HGNC:2704	protein_coding	-	ENST00000286648	deleterious(0.05)	probably_damaging(0.997)	-	0,0,1	0,1,1	0.263	25.3	3.68269	deleterious(0.811)	2.34
rs1229984	chr4:99318162	C	ENSG00000196616	ENST00000305046	Transcript	missense_variant	213	143	48	H/R	cAc/cGc	rs1229984,CM890003,COSV59295640	T	MODERATE	-1	ADH1B	HGNC	HGNC:250	protein_coding	1	ENST00000625860	tolerated(0.65)	benign(0)	protective	0,0,1	1,1,1	0.661	13.06	1.13127	neutral(0.003)	1.3
rs1130432	chr6:32661352	C	ENSG00000179344	ENST00000434651	Transcript	missense_variant	817	767	256	Q/R	cAg/cGg	rs1130432,COSV66570628	T	MODERATE	-1	HLA-DQB1	HGNC	HGNC:4944	protein_coding	1	ENST00000399082	tolerated(0.14)	benign(0.003)	-	0,1	0,1	0.972	13.49	1.18151	neutral(0.249)	-1.57
rs1126769	chr6:33068658	G	ENSG00000231389	ENST00000419277	Transcript	missense_variant	905	775	259	T/P	Acc/Ccc	rs1126769,COSV70088544	T	MODERATE	-1	HLA-DPA1	HGNC	HGNC:4938	protein_coding	1	ENST00000437811	tolerated(1)	benign(0)	-	0,1	0,1	0.91	10.09	0.86697	neutral(0.000)	-3.38
rs1042178	chr6:33069745	C	ENSG00000231389	ENST00000419277	Transcript	missense_variant	372	242	81	Q/R	cAa/cGa	rs1042178,COSV70089057	T	MODERATE	-1	HLA-DPA1	HGNC	HGNC:4938	protein_coding	1	ENST00000437811	tolerated(0.76)	benign(0)	-	0,1	0,1	0.91	0.01	-0.949098	neutral(0.001)	-4.38
rs9277348	chr6:33080761	C	ENSG00000223865	ENST00000418931	Transcript	missense_variant	242	190	64	F/L	Ttc/Ctc	rs9277348,COSV69604555	T	MODERATE	1	HLA-DPB1	HGNC	HGNC:4940	protein_coding	1	ENST00000453337	tolerated(0.1)	benign(0.012)	-	0,1	1,1	0.974	6.674	0.516348	neutral(0.287)	-
rs1129424	chr8:23068800	A	ENSG00000120889	ENST00000276431	Transcript	missense_variant	232	95	32	P/L	cCc/cTc	rs1129424,COSV52393469	G	MODERATE	-1	TNFRSF10B	HGNC	HGNC:11905	protein_coding	1	ENST00000347739	tolerated(1)	benign(0)	-	0,1	0,1	0.196	2.61	0.153333	neutral(0.000)	-0.265
rs17516758	chr10:94298676	A	ENSG00000138193	ENST00000371380	Transcript	splice_region_variant,intron_variant	-	-	-	-	-	rs17516758,COSV53362421	G	LOW	1	PLCE1	HGNC	HGNC:17175	protein_coding	1	ENST00000371361	-	-	benign	0,1	1,1	0.802	12.55	1.07858	-	-0.927
rs55715265	chr13:52093092	A	ENSG00000197168	ENST00000684899	Transcript	synonymous_variant	1305	1170	390	Y	taC/taT	rs55715265	G	LOW	-1	NEK5	HGNC	HGNC:7748	protein_coding	-	ENST00000617045	-	-	-	-	-	0.98	0.094	-0.547902	-	-4.12
rs1882821	chr14:78243471	C	ENSG00000021645	ENST00000335750	Transcript	synonymous_variant	1383	378	126	D	gaT/gaC	rs1882821	T	LOW	1	NRXN3	HGNC	HGNC:8010	protein_coding	1	ENST00000554738	-	-	benign	-	1	0.00234	0.262	-0.335773	-	-8.4
rs62037369	chr16:28872520	T	ENSG00000178188	ENST00000684370	Transcript	splice_polypyrimidine_tract_variant,intron_variant	-	-	-	-	-	rs62037369,COSV59468091	C	LOW	1	SH2B1	HGNC	HGNC:30417	protein_coding	1	ENST00000568868	-	-	-	0,1	0,1	0.667	0.582	-0.173509	-	-
rs11541059	chr17:4682526	A	ENSG00000141456	ENST00000572293	Transcript	synonymous_variant	644	618	206	F	ttC/ttT	rs11541059,COSV52586750	G	LOW	-1	PELP1	HGNC	HGNC:30134	protein_coding	-	ENST00000570387	-	-	-	0,1	0,1	-	7.476	0.596284	-	-2.3
rs17743547	chr1:181710946	A	ENSG00000198216	ENST00000367573	Transcript	splice_polypyrimidine_tract_variant,splice_region_variant,intron_variant	-	-	-	-	-	rs17743547,COSV62405074	G	LOW	1	CACNA1E	HGNC	HGNC:1392	protein_coding	1	ENST00000700188	-	-	benign	0,1	1,1	0.00131	6.001	0.452532	-	-4.06
rs1062600	chr20:57562742	A	ENSG00000124253	ENST00000319441	Transcript	synonymous_variant	587	453	151	S	tcG/tcA	rs1062600,COSV60128317	G	LOW	1	PCK1	HGNC	HGNC:8724	protein_coding	1	ENST00000319441	-	-	benign	0,1	1,1	0.718	0.732	-0.126264	-	-6.14
rs5764234	chr22:43716965	T	ENSG00000186976	ENST00000262726	Transcript	synonymous_variant	1047	765	255	S	tcG/tcA	rs5764234,COSV53063559	C	LOW	-1	EFCAB6	HGNC	HGNC:24204	protein_coding	-	ENST00000396231	-	-	-	0,1	0,1	0.982	0.115	-0.506172	-	-1.61
rs1546604	chr3:123223555	A	ENSG00000121542	ENST00000492595	Transcript	splice_polypyrimidine_tract_variant,splice_region_variant,intron_variant	-	-	-	-	-	rs1546604,COSV59371437	G	LOW	1	SEC22A	HGNC	HGNC:20260	protein_coding	-	ENST00000309934	-	-	-	0,1	0,1	0.737	7.651	0.614339	-	-6.25
rs4482616	chr3:123300116	G	ENSG00000173175	ENST00000462833	Transcript	splice_donor_region_variant,intron_variant	-	-	-	-	-	rs4482616,COSV59195886	A	LOW	-1	ADCY5	HGNC	HGNC:236	protein_coding	1	ENST00000309934	-	-	benign	0,1	1,1	0.2	1.545	0.031555	-	-7.42
rs2291086	chr3:124796548	A	ENSG00000082781	ENST00000296181	Transcript	synonymous_variant	1898	1533	511	N	aaC/aaT	rs2291086,COSV56148637	G	LOW	-1	ITGB5	HGNC	HGNC:6160	protein_coding	-	ENST00000481591	-	-	-	0,1	0,1	0.0949	8.861	0.744447	-	2.59
rs71599984	chr4:71092723	C	ENSG00000080493	ENST00000649996	Transcript	splice_polypyrimidine_tract_variant,splice_region_variant,intron_variant	-	-	-	-	-	rs71599984	T	LOW	1	SLC4A4	HGNC	HGNC:11030	protein_coding	1	ENST00000698522	-	-	-	-	-	0.0198	8.057	0.657087	-	-0.204
rs151167039	chr4:88732004	G	ENSG00000138640	ENST00000264344	Transcript	splice_region_variant,synonymous_variant	3062	2841	947	S	tcA/tcC	rs151167039	T	LOW	-1	FAM13A	HGNC	HGNC:19367	protein_coding	1	ENST00000323061	-	-	-	-	-	0.987	9.889	0.848879	-	-4.44
rs1130431	chr6:32661378	A	ENSG00000179344	ENST00000434651	Transcript	synonymous_variant	791	741	247	L	ctG/ctT	rs1130431,COSV66570636	C	LOW	-1	HLA-DQB1	HGNC	HGNC:4944	protein_coding	1	ENST00000399082	-	-	-	0,1	0,1	0.972	3.845	0.261983	-	-0.817
rs1049088	chr6:32662091	G	ENSG00000179344	ENST00000434651	Transcript	synonymous_variant	587	537	179	L	ctT/ctC	rs1049088,COSV100891096	A	LOW	-1	HLA-DQB1	HGNC	HGNC:4944	protein_coding	1	ENST00000399082	-	-	-	0,1	0,1	0.972	4.77	0.34175	-	-4.38
rs9277351	chr6:33080823	G	ENSG00000223865	ENST00000418931	Transcript	synonymous_variant	304	252	84	A	gcT/gcG	rs9277351	T	LOW	1	HLA-DPB1	HGNC	HGNC:4940	protein_coding	1	ENST00000417724	-	-	-	-	1	0.974	3.085	0.196562	-	-
rs73383144	chr9:5969307	T	ENSG00000183354	ENST00000399933	Transcript	synonymous_variant	1619	924	308	G	ggG/ggA	rs73383144	C	LOW	-1	KIAA2026	HGNC	HGNC:23378	protein_coding	-	ENST00000381461	-	-	-	-	-	-	6.645	0.513527	-	-3.17

## Sheet: Table S4
Table S4. Classification of immune-related traits associated with signal SNPs and All GWAS Catalog records of Signal selected SNPs.
SNP	Trait	Immune_subcategory	Category
rs2049909	Neutrophil Count	Immune Cell Counts	Other/Proteomic/Assays
rs213485	Platelet Count	Immune Cell Counts	Hematology
rs213485	Platelet Count	Immune Cell Counts	Hematology
rs213483	Platelet Count	Immune Cell Counts	Hematology
rs213482	Platelet Count	Immune Cell Counts	Hematology
rs213480	Platelet Count	Immune Cell Counts	Hematology
rs213498	Enrage Levels	Inflammation Markers	Other/Proteomic/Assays
rs72667481	C-Reactive Protein Levels	Inflammation Markers	Other/Proteomic/Assays
rs1229984	Esophageal Cancer	Infection/Serology	Infection/Serology/Microbiome
rs1229984	C-Reactive Protein Levels	Inflammation Markers	Other/Proteomic/Assays
rs1229984	Monocyte	Immune Cell Counts	Other/Proteomic/Assays
rs1229984	Hyposmolality And/Or Hyponatremia	Inflammation Markers	Renal/Electrolyte
rs16895768	Selective IgA Deficiency	Humoral Immunity	Immune/Autoimmune & Allergy
rs3129882	Systemic Sclerosis	Autoimmune Disease	Immune/Autoimmune & Allergy
rs3129882	Seropositivity For Lactobacillus Phage	Infection/Serology	Infection/Serology/Microbiome
rs3129882	Seropositivity For Gallus Gallus Ovomucoid Precursor Gallus Peptide	Infection/Serology	Infection/Serology/Microbiome
rs3129882	Seropositivity	Infection/Serology	Infection/Serology/Microbiome
rs3129882	Seropositivity For Lactobacillus Plantarum Wcfs1 Peptide	Infection/Serology	Infection/Serology/Microbiome
rs3129882	Seropositivity For Lactobacillus Plantarum Wcfs1 Peptide	Infection/Serology	Infection/Serology/Microbiome
rs3129882	Seropositivity For Lactobacillus Plantarum Wcfs1 Peptide	Infection/Serology	Infection/Serology/Microbiome
rs3129882	Seropositivity For Lactobacillus Plantarum Wcfs1 Peptide	Infection/Serology	Infection/Serology/Microbiome
rs3129882	Seropositivity For Lactobacillus Plantarum Wcfs1 Peptide	Infection/Serology	Infection/Serology/Microbiome
rs3129882	Seropositivity For Lactobacillus Plantarum Wcfs1 Peptide	Infection/Serology	Infection/Serology/Microbiome
rs1130432	Seropositivity For Staphylococcus Aureus Subsp. Aureus Mrsa252 Peptide	Infection/Serology	Infection/Serology/Microbiome
rs1130432	Seropositivity For Enterococcus Faecalis V583 Peptide	Infection/Serology	Infection/Serology/Microbiome
rs1130431	Platelet-Activating Factor Acetylhydrolase Ib Subunit Alpha1 Levels	Immune Cell Counts	Renal/Electrolyte
rs1130431	Mhc Class I Polypeptide-Related Sequence B_A Levels	HLA/Immune Markers	Infection/Serology/Microbiome
rs28746814	Eosinophil Percentage Of White Cells	Allergy/Asthma	Immune/Autoimmune & Allergy
rs17220968	Hypothyroidism Or Rheumatoid Arthritis	Autoimmune Disease	Immune/Autoimmune & Allergy
rs17214573	Hypothyroidism Or Rheumatoid Arthritis	Autoimmune Disease	Immune/Autoimmune & Allergy
rs9277341	Antineutrophil Cytoplasmic Antibody-Associated Vasculitis	Autoimmune Disease	Immune/Autoimmune & Allergy
rs4345439	Graves' Disease	Autoimmune Disease	Immune/Autoimmune & Allergy
rs9277348	Hypothyroidism	Autoimmune Disease	Immune/Autoimmune & Allergy
rs9277351	WBC Count	Immune Cell Counts	Hematology
rs9277351	Fc Receptor-Like Protein 2 Levels	HLA/Immune Markers	Other/Proteomic/Assays
rs2343593	Covid-19	Infection/Serology	Infection/Serology/Microbiome
rs12684208	WBC Count	Immune Cell Counts	Hematology
rs12684208	WBC Count	Immune Cell Counts	Hematology
rs12684208	Monocyte	Immune Cell Counts	Other/Proteomic/Assays
rs56146457	Lymphocyte	Immune Cell Counts	Other/Proteomic/Assays
rs55860526	Eosinophil Counts	Allergy/Asthma	Immune/Autoimmune & Allergy
rs9419387	Neutrophil Count	Immune Cell Counts	Other/Proteomic/Assays
rs12253981	Multiple Sclerosis	Autoimmune Disease	Immune/Autoimmune & Allergy
rs11828343	Asthma	Allergy/Asthma	Liver Enzymes/Liver
rs11828343	Nonatopic Asthma	Allergy/Asthma	Liver Enzymes/Liver
rs7119563	Eosinophil Counts	Allergy/Asthma	Immune/Autoimmune & Allergy
rs7119563	Eosinophil Percentage Of White Cells	Allergy/Asthma	Immune/Autoimmune & Allergy
rs6589245	Eosinophil	Allergy/Asthma	Immune/Autoimmune & Allergy
rs881338	Cd160 Antigen Levels	HLA/Immune Markers	Other/Proteomic/Assays
rs881338	Immunoglobulin Superfamily Dcc Subclass Member 4 Levels	Humoral Immunity	Other/Proteomic/Assays
rs10773000	Endometriosis Or Asthma	Allergy/Asthma	Liver Enzymes/Liver
rs7172696	Fc Receptor-Like Protein 4 Levels	HLA/Immune Markers	Other/Proteomic/Assays
rs12449199	Hla Dr On Hla Dr+ T Cell	HLA/Immune Markers	Other/Proteomic/Assays
rs12449199	Hla Dr On Hla Dr+ Cd4+ T Cell	HLA/Immune Markers	Other/Proteomic/Assays
rs3087456	Hla Dr+ T Cell Absolute Count	HLA/Immune Markers	Other/Proteomic/Assays
rs3087456	Hla Dr+ T Cell%T Cell	HLA/Immune Markers	Other/Proteomic/Assays
rs3087456	Hla Dr+ T Cell%Lymphocyte	HLA/Immune Markers	Other/Proteomic/Assays
rs3087456	Hla Dr+ Cd4+ T Cell Absolute Count	HLA/Immune Markers	Other/Proteomic/Assays
rs3087456	Hla Dr+ Cd4+ T Cell %Lymphocyte	HLA/Immune Markers	Other/Proteomic/Assays
rs3087456	Hla Dr+ Cd8+ T Cell Absolute Count	HLA/Immune Markers	Other/Proteomic/Assays
rs3087456	Hla Dr+ Cd8+ T Cell %T Cell	HLA/Immune Markers	Other/Proteomic/Assays
rs3087456	Hla Dr+ Cd8+ T Cell %Lymphocyte	HLA/Immune Markers	Other/Proteomic/Assays
rs72770017	Cd45 On Hla Dr+ Cd4+ T Cell	HLA/Immune Markers	Other/Proteomic/Assays
rs9924520	Hla Dr On Plasmacytoid Dendritic Cell	HLA/Immune Markers	Other/Proteomic/Assays
rs4781011	Ulcerative Colitis	Autoimmune Disease	Immune/Autoimmune & Allergy
rs73499473	Hla Dr On Cd14- Cd16+ Monocyte	HLA/Immune Markers	Other/Proteomic/Assays
rs11641185	Hla Dr+ Cd4+ T Cell %T Cell	HLA/Immune Markers	Other/Proteomic/Assays
rs62037369	Ulcerative Colitis X Sex Interaction	Autoimmune Disease	Immune/Autoimmune & Allergy
rs62037369	Ulcerative Colitis	Autoimmune Disease	Immune/Autoimmune & Allergy
rs8056890	Allergic Disease	Allergy/Asthma	Immune/Autoimmune & Allergy
rs8045689	Allergic Disease	Allergy/Asthma	Immune/Autoimmune & Allergy
rs6500818	Dengue Shock Syndrome	Infection/Serology	Infection/Serology/Microbiome
rs11658971	C-X-C Motif Chemokine 16 Levels	Inflammation Markers	Other/Proteomic/Assays
rs151352	Platelet Distribution Width	Immune Cell Counts	Hematology
rs151352	Platelet Count	Immune Cell Counts	Hematology
rs151352	Platelet Count	Immune Cell Counts	Hematology
rs151352	Platelet Count	Immune Cell Counts	Hematology
rs151352	Platelet Forward Scatter Distribution Width	Immune Cell Counts	Hematology
rs151352	Platelet Side Scatter Distribution Width	Immune Cell Counts	Hematology
rs4823054	Oncostatin-M Levels	Inflammation Markers	Other/Proteomic/Assays
rs5763701	Oncostatin-M Levels	Inflammation Markers	Other/Proteomic/Assays
rs5756931	Platelet Distribution Width	Immune Cell Counts	Hematology
rs7284980	Osm Levels	Inflammation Markers	Other/Proteomic/Assays

## Sheet: Table S5
Table S5. Selection Signals and Rankings for Candidate Immune Genes.
Gene	Signal SNP count	Top LSBL SNP	Top LSBL value	Top iHS SNP	Top iHS value	Selection strength rank
RBFOX1	162	chr16:6759962	0.3779	chr16:7378422	3.87963	1
HLA-DPA1	25	chr6:33071909	0.3235	chr6:33077210	3.67638	2
YTHDC1	1	chr4:68343696	0.2968	chr4:68343696	6.35361	3
TNFRSF10B-AS1	4	chr8:23070311	0.2915	chr8:23074266	3.7328	4
CDH13	55	chr16:82775822	0.3501	chr16:83307354	3.18782	5
UBA6-DT	96	chr4:68051450	0.338	chr4:68074490	3.18436	6
B4GALT6	4	chr18:31659069	0.2936	chr18:31659069	3.40656	7
TNFRSF10A	24	chr8:23204029	0.3575	chr8:23217975	3.10138	8
MME	9	chr3:155124065	0.3212	chr3:155137368	3.13541	9
TNFRSF10A-DT	7	chr8:23229539	0.3575	chr8:23229539	2.96879	10
HLA-DQB1	33	chr6:32667704	0.2651	chr6:32665706	4.57921	11
WWP2	8	chr16:69925918	0.3044	chr16:69801006	3.16097	12
MDGA2	84	chr14:47207084	0.3587	chr14:47275174	2.93988	13
MOB1B	89	chr4:70902870	0.2655	chr4:70926208	3.42632	14
DAB1	192	chr1:58272576	0.2688	chr1:57077110	3.31591	15
IMMT	1	chr2:86160037	0.2897	chr2:86160037	3.14577	15
PFKFB3	8	chr10:6189107	0.2939	chr10:6155573	3.01538	17
TBC1D12	9	chr10:94498790	0.2639	chr10:94533231	3.32077	18
LINC02649	24	chr10:6303756	0.2889	chr10:6303756	3.01004	19
ACAA2	6	chr18:49800369	0.2795	chr18:49800369	3.10867	20
LINC01344	14	chr1:182129939	0.287	chr1:182124053	2.97703	21
MYO5B	10	chr18:49844564	0.2943	chr18:49844564	2.94154	22
ROBO2	8	chr3:77219625	0.2608	chr3:77219625	3.29647	23
DLGAP1	58	chr18:4111740	0.2581	chr18:4089791	3.24807	24
HELLS	6	chr10:94546752	0.2525	chr10:94546752	3.37777	24
FYB2	10	chr1:56732324	0.2506	chr1:56739599	3.46832	26
NPAS3	19	chr14:33164390	0.2711	chr14:33288589	2.93444	27
PLPP3	40	chr1:56560589	0.2626	chr1:56612522	3.05615	28
PARVB	7	chr22:44064267	0.2559	chr22:44035857	3.1916	29
SSBP3	26	chr1:54317922	0.2597	chr1:54411558	3.10659	30
ENSG00000287231	56	chr10:111866239	0.3651	chr10:111909322	2.68837	31
PCSK6	8	chr15:101480344	0.2381	chr15:101481652	3.87978	31
MAST4	30	chr5:66863272	0.2604	chr5:66858331	3.05706	33
ANKRD17	3	chr4:73114844	0.236	chr4:73197674	4.08874	34
IL2RA	1	chr10:6050383	0.2314	chr10:6050383	3.62531	35
LINC01755	19	chr1:55876971	0.2374	chr1:55819292	3.26985	36
TNFRSF10B	2	chr8:23068800	0.2486	chr8:23068800	3.07958	37
CERS6	15	chr2:168746538	0.3749	chr2:168700902	2.60679	38
GGCX	2	chr2:85559433	0.2439	chr2:85561017	3.16987	39
DYNC1I1	4	chr7:95894233	0.2318	chr7:95846558	3.37023	40
ARHGEF26	2	chr3:154213817	0.2329	chr3:154213817	3.34937	41
HLA-B	2	chr6:31355003	0.2294	chr6:31355003	3.64951	42
AFF1	1	chr4:86950445	0.2787	chr4:86950445	2.72929	43
POM121C	11	chr7:75425615	0.3329	chr7:75441843	2.59461	44
PDE4B	25	chr1:65822625	0.2313	chr1:65956970	3.26316	45
MTMR3	28	chr22:29941456	0.227	chr22:29889506	3.54755	46
PRKAG2	2	chr7:151738636	0.2253	chr7:151601483	3.45354	47
NFAT5	2	chr16:69588404	0.2338	chr16:69628373	3.16256	48
MICA-AS1	1	chr6:31391178	0.2215	chr6:31391178	3.5687	49
MSH6	14	chr2:47759841	0.2438	chr2:47803319	2.93027	50
SPC25	6	chr2:168909227	0.2272	chr2:168911677	3.23041	51
GRID1	10	chr10:85940437	0.2217	chr10:85958760	3.33505	52
NEK10	29	chr3:27317129	0.2099	chr3:27263544	3.98764	53
PMS2P3	8	chr7:75500568	0.314	chr7:75515227	2.52523	54
EFCAB6	125	chr22:43605971	0.2203	chr22:43731593	3.2624	55
ENSG00000260971	2	chr1:56317171	0.2124	chr1:56317171	3.51648	56
RMI2	11	chr16:11369537	0.2403	chr16:11366846	2.84678	57
AOC1	1	chr7:150841370	0.2247	chr7:150841370	3.16066	58
REEP1	110	chr2:86300033	0.295	chr2:86240812	2.52418	59
ARHGAP29	24	chr1:94160112	0.2476	chr1:94254297	2.75809	60
CMAHP	17	chr6:25379907	0.2682	chr6:25372762	2.60118	61
CARMIL1	17	chr6:25379907	0.2682	chr6:25372762	2.60118	61
XYLT1	9	chr16:17213704	0.2253	chr16:17205577	3.01598	63
FAM193A	1	chr4:2692252	0.2459	chr4:2692252	2.7423	64
ENSG00000284989	2	chr1:43900578	0.2202	chr1:43708928	3.13592	65
RABEP1	2	chr17:5372368	0.2247	chr17:5372368	3.02605	66
MAML3	4	chr4:139737345	0.2188	chr4:139731690	3.10134	67
BTD	1	chr3:15621904	0.2032	chr3:15621904	3.38143	68
LINC02318	3	chr14:95549190	0.2043	chr14:95549190	3.30955	69
CAMKMT	3	chr2:44492754	0.2412	chr2:44497908	2.73445	70
SLC7A14-AS1	2	chr3:170573567	0.3139	chr3:170573567	2.42085	71
TBC1D5	33	chr3:17509174	0.2282	chr3:17532194	2.86615	72
PPP2R2B	2	chr5:146990833	0.2399	chr5:146990833	2.72364	73
PLCE1	19	chr10:94284392	0.2473	chr10:94330140	2.66055	74
HORMAD2-AS1	21	chr22:30036642	0.1965	chr22:30057842	3.43869	75
HDAC9	4	chr7:18991526	0.1948	chr7:18168210	4.11541	76
SMTNL2	7	chr17:4599015	0.2799	chr17:4598950	2.44647	77
SLIT3	15	chr5:169140635	0.3132	chr5:169161595	2.39009	78
ALG11	19	chr13:52015400	0.2307	chr13:52056388	2.7467	79
IL15RA	14	chr10:5958905	0.2329	chr10:5958905	2.72192	80
PDIA5	87	chr3:123200159	0.2665	chr3:123219719	2.47289	81
HORMAD2	43	chr22:30085652	0.1965	chr22:30129035	3.31224	82
MARCHF1	42	chr4:163570031	0.226	chr4:164145238	2.77154	83
SLC4A4	51	chr4:71096556	0.3049	chr4:71081448	2.39217	84
ADH1B	1	chr4:99318162	0.3162	chr4:99318162	2.36521	85
ERRFI1-DT	3	chr1:8092295	0.3762	chr1:8092295	2.33395	86
STAG3L2	1	chr7:74882751	0.202	chr7:74882751	3.05019	87
NRXN1	3	chr2:50664871	0.2907	chr2:50692159	2.39122	88
NSMAF	3	chr8:58654609	0.2444	chr8:58654609	2.57899	89
TASOR2	2	chr10:5685239	0.2121	chr10:5685287	2.88138	90
HTR2A	13	chr13:46892935	0.1899	chr13:46892646	3.67816	91
LEPR	16	chr1:65589971	0.2088	chr1:65640201	2.86945	92
FIRRM	5	chr1:169722991	0.2439	chr1:169733200	2.57376	92
LINGO2	8	chr9:28257150	0.1959	chr9:27941845	3.20698	94
RRAS2	2	chr11:14305771	0.1887	chr11:14332426	4.14919	95
MEAK7	8	chr16:84516961	0.2136	chr16:84510919	2.78685	96
SPNS3	9	chr17:4468584	0.2288	chr17:4456417	2.67696	97
PSMA1	2	chr11:14590444	0.1887	chr11:14590444	3.84848	98
PDE3B	8	chr11:14783129	0.1887	chr11:14707559	3.80821	99
MASP1	1	chr3:187235533	0.2206	chr3:187235533	2.72865	100
TENM4	11	chr11:78727231	0.2427	chr11:78965375	2.54831	101
FAM13A	26	chr4:88941018	0.1993	chr4:88736473	2.95365	102
TENM2	8	chr5:167536619	0.2179	chr5:167536619	2.7066	103
PARD3B	31	chr2:204736258	0.2444	chr2:205166120	2.48833	104
OSBP2	15	chr22:30721441	0.2882	chr22:30717841	2.32915	104
CIITA	17	chr16:10874615	0.241	chr16:10874615	2.51171	106
SMG7-AS1	1	chr1:183453487	0.2078	chr1:183453487	2.74843	107
FAM167A-AS1	5	chr8:11370497	0.2292	chr8:11369595	2.60208	108
NOSTRIN	4	chr2:168789014	0.3145	chr2:168789014	2.26737	109
PTPRT	3	chr20:43108046	0.2163	chr20:42484021	2.68848	110
SDCBP	1	chr8:58578327	0.1835	chr8:58578327	3.54012	111
L3MBTL1	1	chr20:43547305	0.1908	chr20:43547305	3.1623	111
IWS1	8	chr2:127436236	0.2127	chr2:127438944	2.69877	113
LCP1	1	chr13:46210261	0.3329	chr13:46210261	2.24701	114
AGBL4	1	chr1:48546999	0.2172	chr1:48546999	2.67537	115
P3H2	36	chr3:189980955	0.2925	chr3:189997896	2.28729	116
ALDH1A2	14	chr15:58497331	0.225	chr15:58368112	2.59193	117
PLA2G6	7	chr22:38150026	0.1976	chr22:38157404	2.8568	118
ENSG00000302067	1	chr10:6461749	0.2202	chr10:6461749	2.63754	119
SMG7	5	chr1:183508096	0.2122	chr1:183487341	2.68581	120
PELP1	1	chr17:4682526	0.2654	chr17:4682526	2.36102	121
CLEC16A	12	chr16:11050352	0.1838	chr16:11018550	3.29568	122
ADARB2	2	chr10:1459246	0.2422	chr10:1459246	2.44995	123
CACNA1E	51	chr1:181692701	0.2039	chr1:181752820	2.7266	124
HMGCLL1	14	chr6:55455880	0.2367	chr6:55454982	2.47993	125
RERE	2	chr1:8488449	0.2888	chr1:8488449	2.27131	126
SPON1	5	chr11:14141717	0.1887	chr11:14261400	3.15446	127
RNF4	2	chr4:2510736	0.2788	chr4:2510736	2.29838	128
GRIN2B	4	chr12:13509270	0.2054	chr12:13509270	2.69595	129
BCO1	1	chr16:81267855	0.1897	chr16:81267855	2.94176	130
ODR4	2	chr1:186381972	0.2765	chr1:186381972	2.27072	131
PIAS2	1	chr18:46856817	0.1962	chr18:46856817	2.81203	131
NEK5	7	chr13:52087877	0.2032	chr13:52084699	2.68935	133
DCK	6	chr4:71026418	0.225	chr4:71022523	2.52791	134
SH2B1	12	chr16:28864161	0.2012	chr16:28872520	2.69832	135
GRID2	28	chr4:92637191	0.2493	chr4:93717313	2.37843	136
RBM17	3	chr10:6113843	0.1747	chr10:6100513	4.00013	137
SH3BP2	15	chr4:2794371	0.2856	chr4:2819999	2.2326	138
TEKT5	1	chr16:10634511	0.1873	chr16:10634511	3.00744	139
CXCL16	1	chr17:4734403	0.3279	chr17:4734403	2.19772	140
LRRTM4	5	chr2:77184675	0.2415	chr2:77241665	2.40406	141
DLGAP5	3	chr14:55166872	0.2105	chr14:55153750	2.57237	142
PARK7	1	chr1:7964532	0.343	chr1:7964532	2.17757	143
RAP2B	1	chr3:153169011	0.2048	chr3:153169011	2.61217	143
TADA1	2	chr1:166862708	0.19	chr1:166862708	2.83231	145
AUTS2	6	chr7:70755788	0.2095	chr7:70716549	2.55869	146
FHIT	1	chr3:60659989	0.3104	chr3:60659989	2.18463	146
ATG14	3	chr14:55371545	0.1963	chr14:55371545	2.72808	148
ILDR2	1	chr1:166902135	0.2043	chr1:166902135	2.57313	149
CCDST	1	chr1:152274666	0.1705	chr1:152274666	5.22359	150
EVA1A	1	chr2:75521819	0.2129	chr2:75521819	2.51047	151
PTPRG	1	chr3:61981197	0.2267	chr3:61981197	2.42962	152
PCDH9	16	chr13:67032186	0.1823	chr13:67005663	2.89561	153
HABP2	6	chr10:113557273	0.2035	chr10:113554739	2.55887	154
PRKCH	4	chr14:61473918	0.208	chr14:61410377	2.51673	155
FBXO11	3	chr2:47904797	0.1713	chr2:47851699	3.57822	155
PCK1	2	chr20:57562742	0.2365	chr20:57561954	2.36281	157
COLGALT1	1	chr19:17579064	0.2578	chr19:17579064	2.26436	158
ASB13	6	chr10:5640172	0.2396	chr10:5640651	2.34809	159
LINC02645	31	chr10:2453572	0.1965	chr10:2453572	2.62511	160
CPNE4	4	chr3:131897037	0.2046	chr3:131897037	2.52006	161
ELN	2	chr7:74040299	0.2441	chr7:74028951	2.30629	162
TMEM245	2	chr9:109057518	0.1722	chr9:109057518	3.2609	163
TGFBR2	4	chr3:30687433	0.2851	chr3:30642014	2.1749	164
MAPK10	25	chr4:86298252	0.2093	chr4:86335103	2.46579	165
IL34	3	chr16:70624916	0.1705	chr16:70624916	3.33183	166
IQCM	14	chr4:149820149	0.203	chr4:149849286	2.52431	167
ASCC2	2	chr22:29802036	0.194	chr22:29802036	2.6553	168
WNT7A	1	chr3:13830773	0.1782	chr3:13830773	2.93383	168
LRP1B	1	chr2:140993892	0.2084	chr2:140993892	2.46617	170
ABCC6	1	chr16:16184193	0.1776	chr16:16184193	2.91688	171
ATP2A1	8	chr16:28903896	0.2042	chr16:28882250	2.47807	172
TBC1D22A	24	chr22:47139734	0.1774	chr22:46773009	2.90635	173
HLA-DPB1	3	chr6:33080823	0.1742	chr6:33080823	2.99978	174
VLDLR-AS1	23	chr9:2447515	0.2236	chr9:2468858	2.38976	175
RRP12	2	chr10:97412994	0.2001	chr10:97397398	2.52143	176
BRD10	18	chr9:5978437	0.2473	chr9:6001737	2.24789	177
CDH11	4	chr16:65105493	0.1829	chr16:65120882	2.73623	178
SLCO3A1	3	chr15:92136890	0.2283	chr15:92144553	2.34826	179
LAMA5	2	chr20:62355333	0.2218	chr20:62355333	2.37272	180
KALRN	39	chr3:124688243	0.1659	chr3:124688243	3.35419	181
PEX5L	3	chr3:179921561	0.2772	chr3:179996836	2.15605	182
STK10	15	chr5:172170681	0.2018	chr5:172170681	2.45645	183
DCC	9	chr18:53404576	0.1915	chr18:53404576	2.57741	184
PTPRF	1	chr1:43582577	0.1737	chr1:43582577	2.91435	185
FAM117B	2	chr2:202681531	0.192	chr2:202681531	2.5543	186
HERC3	2	chr4:88703068	0.2005	chr4:88703068	2.44594	187
NLRP11	6	chr19:55804259	0.2654	chr19:55802424	2.16963	188
ACYP2	3	chr2:53971924	0.187	chr2:53971924	2.65169	189
LGALS3	1	chr14:55133712	0.2	chr14:55133712	2.44976	190
CADPS	10	chr3:62693660	0.1879	chr3:62707253	2.63409	191
TENM3	4	chr4:182471112	0.1821	chr4:182595734	2.67174	192
CLIC4	1	chr1:24790110	0.1614	chr1:24790110	3.55765	193
HLA-DQB2	1	chr6:32757080	0.2289	chr6:32757080	2.28027	194
ADGRF5	3	chr6:46921141	0.236	chr6:46921141	2.22969	195
DCDC1	1	chr11:31300907	0.206	chr11:31300907	2.38248	196
EMX2OS	1	chr10:117538125	0.2323	chr10:117538125	2.23907	197
WARS2	1	chr1:119066346	0.2248	chr1:119066346	2.30557	198
RNF103-CHMP3	6	chr2:86534866	0.2675	chr2:86625071	2.13552	199
CACNA2D3	8	chr3:54880308	0.1948	chr3:54687715	2.46722	200
PCAT1	2	chr8:126817462	0.1742	chr8:126817462	2.77046	201
UBASH3B	1	chr11:122728802	0.2658	chr11:122728802	2.13333	201
SLC45A4	2	chr8:141226958	0.1849	chr8:141226489	2.59041	203
SORBS3	3	chr8:22562042	0.2303	chr8:22560170	2.2375	204
MPHOSPH9	14	chr12:123205350	0.2041	chr12:123234981	2.36107	205
GSE1	1	chr16:85357138	0.1835	chr16:85357138	2.5809	206
TTC7B	2	chr14:90640106	0.172	chr14:90640106	2.80619	207
SIK2	22	chr11:111685072	0.1795	chr11:111619696	2.64548	208
SV2C	4	chr5:76269538	0.1699	chr5:76268612	2.87063	209
SCD5	7	chr4:82747155	0.1726	chr4:82742593	2.77602	210
SPARCL1	2	chr4:87487573	0.1839	chr4:87487573	2.56855	211
PPP2R2D	1	chr10:131944854	0.2257	chr10:131944854	2.24663	212
PRKD1	2	chr14:29799665	0.1832	chr14:29799665	2.57569	213
ADAMTSL1	6	chr9:18752237	0.1795	chr9:18232809	2.63318	214
PTPN3	2	chr9:109460003	0.2058	chr9:109396554	2.33847	215
DMAC1	12	chr9:7883862	0.2122	chr9:7876308	2.31052	216
EMP2	1	chr16:10547972	0.215	chr16:10547972	2.29272	217
MTSS1	27	chr8:124711749	0.2206	chr8:124694588	2.2596	218
DYRK1A	1	chr21:37503250	0.1597	chr21:37503250	3.31009	219
ACOXL	2	chr2:110918113	0.1719	chr2:110918113	2.76101	220
EFCAB6-AS1	3	chr22:43544485	0.1868	chr22:43544485	2.51641	221
AGBL1	1	chr15:86735145	0.3429	chr15:86735145	2.00536	222
GPC6	6	chr13:93447603	0.1624	chr13:93457837	3.04746	223
NRXN3	5	chr14:78238593	0.1619	chr14:78247587	3.06858	224
ARHGAP26	2	chr5:143128971	0.1642	chr5:143024573	2.93932	224
TNFRSF10C	2	chr8:23109777	0.1573	chr8:23109777	3.6256	226
HECW1	3	chr7:43287721	0.1661	chr7:43272942	2.85589	227
EBF1	5	chr5:158997383	0.1801	chr5:158962143	2.55308	228
GRIP1	2	chr12:66722147	0.1654	chr12:66722147	2.87095	229
CTNNA2	4	chr2:79920197	0.1994	chr2:79899024	2.34459	230
USP10	2	chr16:84727881	0.1723	chr16:84714290	2.69603	231
EPG5	1	chr18:45954662	0.1658	chr18:45954662	2.82509	232
RBMS3	9	chr3:29658150	0.1921	chr3:29661130	2.38974	233
DMRT1	1	chr9:902888	0.1567	chr9:902888	3.28254	234
NBEA	5	chr13:35564160	0.1886	chr13:35565094	2.42936	235
POU6F2	11	chr7:39101932	0.1666	chr7:39107855	2.75849	236
CARD11	2	chr7:2913808	0.2183	chr7:2921780	2.21702	237
ENSG00000288587	1	chr6:31416091	0.1757	chr6:31416091	2.57688	238
TRIOBP	1	chr22:37767770	0.2612	chr22:37767770	2.06821	239
ASB15	1	chr7:123597649	0.2391	chr7:123597649	2.147	240
STAP1	1	chr4:67601579	0.2731	chr4:67601579	2.02898	241
NAALADL2	3	chr3:174444166	0.235	chr3:174444166	2.14938	242
LINC02715	1	chr11:109460413	0.2107	chr11:109460413	2.22394	243
GABRB3	1	chr15:26931265	0.2051	chr15:26931265	2.23837	244
ANKRD16	1	chr10:5872798	0.1758	chr10:5872798	2.54601	245
PPP2R2A	10	chr8:26298765	0.1592	chr8:26355570	3.01072	246
PCSK5	4	chr9:75900955	0.1917	chr9:75915422	2.35487	247
ZMAT5	4	chr22:29738071	0.1999	chr22:29738071	2.28188	248
AUH	1	chr9:91283049	0.1597	chr9:91283049	2.95578	249
ANKRD13C	1	chr1:70335478	0.1569	chr1:70335478	3.14508	250
SBNO1	9	chr12:123348365	0.1891	chr12:123290838	2.39064	251
DYNLRB2-AS1	5	chr16:80455806	0.2406	chr16:80455806	2.11251	252
CHRNA2	1	chr8:27467956	0.2541	chr8:27467956	2.05496	253
PLD1	8	chr3:171808153	0.235	chr3:171796285	2.1254	254
COLEC11	1	chr2:3606298	0.1632	chr2:3606298	2.72776	255
RAB11FIP3	5	chr16:426796	0.2044	chr16:426796	2.21881	256
ABCB11	2	chr2:169029942	0.1583	chr2:168926064	2.92204	257
CHRNE	4	chr17:4930183	0.1666	chr17:4928495	2.66755	258
HLA-DRA	1	chr6:32441753	0.1946	chr6:32441753	2.29213	259
BNIP3L	8	chr8:26384606	0.1592	chr8:26384606	2.86497	260
DLG2	3	chr11:83777981	0.1975	chr11:83778372	2.24032	261
PPP1R9A	1	chr7:95054705	0.158	chr7:95054705	2.88708	262
ATP5F1E	1	chr20:59026940	0.2246	chr20:59026940	2.14284	263
NUB1	1	chr7:151356458	0.1887	chr7:151356458	2.33278	264
ZNF236	1	chr18:76847647	0.2404	chr18:76847647	2.05965	265
PLEKHA6	1	chr1:204280949	0.2523	chr1:204280949	2.02482	266
KIR2DP1	1	chr19:54759788	0.2319	chr19:54759788	2.08609	267
PRKCE	1	chr2:45859000	0.1742	chr2:45859000	2.45146	268
SLC6A13	3	chr12:253203	0.1895	chr12:252204	2.30805	269
LINC01517	1	chr10:28936384	0.2176	chr10:28936384	2.14024	270
MTRFR	3	chr12:123251537	0.1787	chr12:123248777	2.38378	271
ADAMTS13	1	chr9:133455576	0.2002	chr9:133455576	2.19643	272
XXYLT1	7	chr3:195087006	0.2146	chr3:195076148	2.147	273
NEURL1B	2	chr5:172676516	0.1762	chr5:172679307	2.40874	274
SPNS1	4	chr16:28976948	0.2231	chr16:28976948	2.11297	275
CD36	1	chr7:80536705	0.1614	chr7:80536705	2.66748	276
SUCLG2	27	chr3:67514529	0.1942	chr3:67542889	2.22174	277
MAST2	2	chr1:45878866	0.159	chr1:45925004	2.73368	277
SPRY4-AS1	3	chr5:142684869	0.1778	chr5:142676726	2.3853	279
IGLON5	2	chr19:51318437	0.2279	chr19:51319940	2.07866	280
FAIM2	1	chr12:49896771	0.2159	chr12:49896771	2.12549	281
SPSB1	3	chr1:9356688	0.1915	chr1:9359231	2.22383	282
CHSY1	1	chr15:101227305	0.1576	chr15:101227305	2.74646	283
KCNIP4	1	chr4:21900877	0.1862	chr4:21900877	2.28663	284
ZBTB16	12	chr11:114208485	0.1936	chr11:114208485	2.21408	285
LARP4B	1	chr10:818024	0.2096	chr10:818024	2.13714	286
ANKRD27	1	chr19:32652443	0.1805	chr19:32652443	2.33038	287
LIPC	1	chr15:58522793	0.1701	chr15:58522793	2.44779	288
DLEU1	2	chr13:50836008	0.1835	chr13:50645209	2.29297	289
RABEP2	6	chr16:28933075	0.2021	chr16:28933075	2.15412	290
MTAP	1	chr9:21822647	0.1591	chr9:21822647	2.67235	291
ENSG00000297649	3	chr10:96747075	0.2083	chr10:96747075	2.11839	292
ADCY5	3	chr3:123300572	0.2308	chr3:123296030	2.03285	293
GLIS3	1	chr9:4162453	0.1854	chr9:4162453	2.2448	294
ARHGEF11	7	chr1:156953686	0.2151	chr1:156953686	2.06783	295
PTPRN2	1	chr7:158323161	0.1803	chr7:158323161	2.26597	296
BMPR1B	1	chr4:94789899	0.1887	chr4:94789899	2.20379	297
GAB2	18	chr11:78412785	0.1856	chr11:78413488	2.21997	298
CPQ	4	chr8:96647180	0.1614	chr8:96683070	2.49161	299
FHOD3	1	chr18:36303284	0.1727	chr18:36303284	2.32923	300
PRKCQ	1	chr10:6556897	0.1917	chr10:6556897	2.15309	301
STOX1	1	chr10:68845920	0.1849	chr10:68845920	2.19205	302
FAM180A	1	chr7:135745205	0.159	chr7:135745205	2.5377	303
GRM8	7	chr7:127088358	0.1987	chr7:127049547	2.09855	304
TLN2	2	chr15:62830854	0.1727	chr15:62806462	2.3007	305
COL11A2	1	chr6:33169912	0.2004	chr6:33169912	2.08366	306
DCLK1	2	chr13:35812699	0.1647	chr13:35812699	2.39831	307
CRISPLD2	2	chr16:84914071	0.1858	chr16:84912856	2.17985	308
SORBS1	1	chr10:95506595	0.193	chr10:95506595	2.1348	309
PER3	12	chr1:7787786	0.1724	chr1:7837562	2.30098	310
SHROOM3	2	chr4:76574158	0.1975	chr4:76574158	2.09362	311
RSRP1	1	chr1:25295931	0.1727	chr1:25295931	2.28564	312
CFAP61	1	chr20:20120290	0.1614	chr20:20120290	2.43949	313
CFAP20DC-DT	4	chr3:59372184	0.1955	chr3:59375484	2.11528	314
ITGA6	1	chr2:172342514	0.1982	chr2:172342514	2.07592	315
RAB3C	1	chr5:58622035	0.1627	chr5:58622035	2.39903	316
CNTN5	1	chr11:99167267	0.1583	chr11:99167267	2.49661	316
ACO2	2	chr22:41510321	0.2074	chr22:41514240	2.02298	318
LAMB1	1	chr7:107939200	0.1724	chr7:107939200	2.26566	319
ANO6	1	chr12:45227675	0.1727	chr12:45227675	2.24245	320
FANCM	1	chr14:45194630	0.2032	chr14:45194630	2.03445	321
ITGB5	4	chr3:124798107	0.1645	chr3:124795358	2.35773	322
HCG20	1	chr6:30783661	0.2037	chr6:30783661	2.02416	323
LAMA2	2	chr6:129291418	0.1717	chr6:129291418	2.25398	324
CASP8	6	chr2:201305866	0.1614	chr2:201311804	2.38807	325
NECTIN1	1	chr11:119624507	0.1645	chr11:119624507	2.33318	326
TNRC6B	13	chr22:40216127	0.1901	chr22:40220703	2.09696	327
SYTL2	1	chr11:85758472	0.1597	chr11:85758472	2.40477	328
LRRK1	1	chr15:101059041	0.1742	chr15:101059041	2.20229	329
SWT1	1	chr1:185227247	0.1758	chr1:185227247	2.18598	330
FOXP2	1	chr7:114445715	0.1731	chr7:114445715	2.20269	331
HDAC4	2	chr2:239147038	0.1852	chr2:239179476	2.11786	332
VWA7	1	chr6:31772968	0.1757	chr6:31772968	2.17468	333
PVT1	4	chr8:128160872	0.1851	chr8:128167744	2.10884	334
PLPP4	1	chr10:120531830	0.1691	chr10:120531830	2.22626	335
ENSG00000288853	6	chr11:78422031	0.1813	chr11:78422031	2.13144	336
LHPP	1	chr10:124606939	0.1799	chr10:124606939	2.13404	337
DZIP3	1	chr3:108599065	0.1653	chr3:108599065	2.25471	338
FAM89A	1	chr1:231035443	0.1671	chr1:231035443	2.22803	339
THOC5	6	chr22:29517812	0.1705	chr22:29517812	2.19811	340
BAIAP2L1	1	chr7:98384070	0.1597	chr7:98384070	2.34616	341
MEI1	1	chr22:41775796	0.1597	chr22:41775796	2.34581	342
SDK1	1	chr7:4212717	0.169	chr7:4212717	2.20867	343
SIPA1L2	9	chr1:232603012	0.169	chr1:232608676	2.2065	344
CSMD1	1	chr8:3322756	0.1893	chr8:3322756	2.05425	344
UBAC2	1	chr13:99327480	0.1655	chr13:99327480	2.22822	346
CHD2	2	chr15:92921957	0.1597	chr15:92921957	2.32763	347
BACH2	1	chr6:89964065	0.1781	chr6:89964065	2.11599	348
DGKB	1	chr7:14403613	0.1614	chr7:14403613	2.27187	349
SAXO1	1	chr9:18984667	0.162	chr9:18984667	2.24724	350
OPCML	25	chr11:133418440	0.1785	chr11:133001793	2.08313	351
MMP2	1	chr16:55449279	0.1601	chr16:55449279	2.28706	352
DNMBP	1	chr10:99961203	0.1902	chr10:99961203	2.01173	353
ZNF385D	1	chr3:21939772	0.1797	chr3:21939772	2.06577	354
SLC39A7	1	chr6:33202118	0.1743	chr6:33202118	2.12545	354
SCUBE1	2	chr22:43260889	0.1772	chr22:43260889	2.09209	356
STK32B	1	chr4:5445657	0.1654	chr4:5445657	2.19183	357
KMT2A	2	chr11:118492154	0.1815	chr11:118488446	2.05124	358
LINC02571	3	chr6:31294152	0.1781	chr6:31294152	2.06743	359
BTG1-DT	2	chr12:92205207	0.1828	chr12:92208035	2.03802	360
ZFPM2	2	chr8:105577306	0.1757	chr8:105578623	2.08243	361
WNT2	1	chr7:117277373	0.176	chr7:117277373	2.06477	362
PITPNM2	2	chr12:123110616	0.162	chr12:123110616	2.19241	363
EYA4	1	chr6:133247575	0.1721	chr6:133247575	2.11405	364
NUP133	1	chr1:229472728	0.1705	chr1:229472728	2.11339	365
GPM6A	1	chr4:175735851	0.1576	chr4:175735851	2.24209	366
NKAIN2	2	chr6:124583690	0.1591	chr6:124583690	2.22181	367
CNTNAP2	1	chr7:147451364	0.1614	chr7:147451364	2.18307	367
CALM2	2	chr2:47172462	0.1765	chr2:47172462	2.04459	369
MSH2	1	chr2:47633503	0.1771	chr2:47633503	2.04047	370
SNX29	3	chr16:11979943	0.1666	chr16:12410245	2.13416	371
ERC1	1	chr12:1401339	0.1777	chr12:1401339	2.02992	372
UTS2	1	chr1:7845214	0.1724	chr1:7845214	2.05532	373
ADAM12	1	chr10:126201945	0.1747	chr10:126201945	2.01651	374
COPS3	1	chr17:17266731	0.1705	chr17:17266731	2.05373	375
CUX1	2	chr7:101827788	0.173	chr7:101846404	2.03369	376
POLR2F	1	chr22:37964044	0.1748	chr22:37964044	2.00511	377
CEP128	2	chr14:80863460	0.1587	chr14:80864242	2.17357	378
ITPR1	1	chr3:4574377	0.1692	chr3:4574377	2.05312	379
MTUS2	1	chr13:29167993	0.1576	chr13:29167993	2.16502	380
ANXA2	1	chr15:60358799	0.1603	chr15:60358799	2.10422	381
MTSS2	1	chr16:70661860	0.1682	chr16:70661860	2.02077	382
LILRB5	1	chr19:54251769	0.169	chr19:54251769	2.00888	383
TEC	1	chr4:48259577	0.1685	chr4:48259577	2.01382	384
WNT7B	1	chr22:45942577	0.158	chr22:45942577	2.12639	385
FAM135B	1	chr8:138221357	0.1596	chr8:138221357	2.10192	386
LINC00970	1	chr1:168836348	0.1616	chr1:168836348	2.03044	387
ADGRV1	1	chr5:90687239	0.1606	chr5:90687239	2.04284	388
LINC00973	8	chr3:99176861	0.158	chr3:99199456	2.06537	389
TRIM17	1	chr1:228413937	0.1579	chr1:228413937	2.00381	390

## Sheet: Table S6
Table S6. Pathogen abbreviations, full names, and categories corresponding to Table 2.
Abbreviation	Full name	Category
SARS-CoV-2	Severe acute respiratory syndrome coronavirus 2	Virus
HBV	Hepatitis B virus	Virus
HCV	Hepatitis C virus	Virus
HIV / HIV-1	Human immunodeficiency virus 1	Virus
HPV	Human papillomavirus	Virus
RSV	Respiratory syncytial virus	Virus
IAV	Influenza A virus	Virus
WNV	West Nile virus	Virus
DENV	Dengue virus	Virus
ZIKV	Zika virus	Virus
MeV	Measles Virus	Virus
EBV	Epstein–Barr virus	Virus
HCMV	Human cytomegalovirus	Virus
HHV-7	Human herpesvirus 7	Virus
HSV / HSV-1	Herpes simplex virus type 1	Virus
KSHV	Kaposi's sarcoma-associated herpesvirus (HHV-8)	Virus
HTLV-1	Human T-lymphotropic virus 1	Virus
SV40	Simian virus 40	Virus
ALV-J	Avian leukosis virus subgroup J	Virus
AdV	Adenovirus	Virus
EV-A71	Enterovirus A71	Virus
JEV	Japanese encephalitis virus	Virus
LGTV	Langat virus	Virus
MLV	Murine leukemia virus	Virus
EBOV	Ebola virus	Virus
MeV	Measles virus	Virus
Prion	Prion	Prion
S. aureus	Staphylococcus aureus	Bacterium
S. Typhi	Salmonella enterica serovar Typhi	Bacterium
C. trachomatis	Chlamydia trachomatis	Bacterium
H. pylori	Helicobacter pylori	Bacterium
P. falciparum	Plasmodium falciparum	Parasite (protozoan)
P. vivax	Plasmodium vivax	Parasite (protozoan)
P. berghei ANKA	Plasmodium berghei (ANKA strain)	Parasite (protozoan)
T. cruzi	Trypanosoma cruzi	Parasite (protozoan)
L. donovani	Leishmania donovani	Parasite (protozoan)
L. major	Leishmania major	Parasite (protozoan)
S. mansoni	Schistosoma mansoni	Parasite (helminth)
O. volvulus	Onchocerca volvulus	Parasite (helminth)
N. caninum	Neospora caninum	Parasite (protozoan)
Malaria	Malaria (Plasmodium spp.)	Parasitic disease

## Sheet: Table S7
Table S7. GWAS catalog records of signal SNPs in HLA-DQB1 and HLA-DPA1.
SNP	Chr	Pos	Gene	Date added to catalog	PubmedID	Journal	Study	DIisease/Trait	Strongest SNP-risk allele	Context	Intergenic	Risk allele frequency	P-value	Pvalue_MLOG	P-value (TEXT)	OR or BETA	95% CI (TEXT)	Platform [SNPS PASSING QC]	Mapped_trait
rs1130432	chr6	32661352	HLA-DQB1	2024-02-23	37164013	Immunity	Phage display sequencing reveals that genetic, environmental, and intrinsic factors influence variation of human antibody epitope repertoire.	Seropositivity for staphylococcus aureus subsp. aureus MRSA252 peptide (agilent_171144)	rs1130432-?	missense_variant	0	NR	5e-10	9.30103	(additive)	6.227	z score increase	NR [4546708] (imputed)	staphylococcus seropositivity
rs1130432	chr6	32661352	HLA-DQB1	2024-02-23	37164013	Immunity	Phage display sequencing reveals that genetic, environmental, and intrinsic factors influence variation of human antibody epitope repertoire.	Seropositivity for enterococcus faecalis v583 peptide (agilent_219731)	rs1130432-?	missense_variant	0	NR	1e-09	9	(additive)	6.094	z score increase	NR [4546708] (imputed)	enterococcus faecalis seropositivity
rs1130432	chr6	32661352	HLA-DQB1	2025-01-06	39024449	Science	Diversity and scale: Genetic architecture of 2068 traits in the VA Million Veteran Program.	low density lipoprotein cholesterol (LDLC, mean, inv-norm transformed)	rs1130432-T	missense_variant	0	0.8043	2e-16	15.699		0.03471	[0.026-0.043] unit decrease	NR [44300000] (imputed)	low density lipoprotein cholesterol measurement
rs1130432	chr6	32661352	HLA-DQB1	2024-09-20	37794183	Nature	Rare variant associations with plasma protein levels in the UK Biobank.	Nucleolar protein 56 levels	chr6:32661352-?		1	NR	1e-08	8	(dominant)	0.0611693	[-0.08214761--0.040190997] unit decrease	NR [617073]
rs1130432	chr6	32661352	HLA-DQB1	2024-09-20	37794183	Nature	Rare variant associations with plasma protein levels in the UK Biobank.	WAP four-disulfide core domain protein 1 levels	chr6:32661352-?		1	NR	4e-08	7.39794	(genotypic)	0.0502101	[-0.068172325--0.032247948] unit decrease	NR [617073]	level of WAP four-disulfide core domain protein 1 in blood serum
rs1130432	chr6	32661352	HLA-DQB1	2024-09-20	37794183	Nature	Rare variant associations with plasma protein levels in the UK Biobank.	Adrenodoxin, mitochondrial levels	chr6:32661352-?		1	NR	3e-08	7.52288	(genotypic)	0.0519768	[-0.070291495--0.033662062] unit decrease	NR [617073]
rs1130432	chr6	32661352	HLA-DQB1	2024-09-20	37794183	Nature	Rare variant associations with plasma protein levels in the UK Biobank.	GDNF family receptor alpha-2 levels	chr6:32661352-?		1	NR	2e-24	23.699	(dominant)	0.107038	[-0.127577249--0.0864992] unit decrease	NR [617073]	GDNF family receptor alpha-2 measurement
rs1130431	chr6	32661378	HLA-DQB1	2024-09-20	37794183	Nature	Rare variant associations with plasma protein levels in the UK Biobank.	Cytosolic Fe-S cluster assembly factor NUBP1 levels	chr6:32661378-?		1	NR	9e-20	19.0458	(genotypic)	0.0840434	[-0.102137506--0.065949361] unit decrease	NR [617073]	level of cytosolic Fe-S cluster assembly factor NUBP1 in blood serum
rs1130431	chr6	32661378	HLA-DQB1	2024-09-20	37794183	Nature	Rare variant associations with plasma protein levels in the UK Biobank.	Neuropilin-2 levels	chr6:32661378-?		1	NR	2e-13	12.699	(genotypic)	0.0645776	[0.047415732-0.08173947] unit increase	NR [617073]	level of neuropilin-2 in blood serum
rs1130431	chr6	32661378	HLA-DQB1	2024-09-20	37794183	Nature	Rare variant associations with plasma protein levels in the UK Biobank.	Platelet-activating factor acetylhydrolase IB subunit alpha1 levels	chr6:32661378-?		1	NR	2e-39	38.699	(genotypic)	0.120029	[-0.137937231--0.10212147] unit decrease	NR [617073]	level of platelet-activating factor acetylhydrolase IB subunit alpha1 in blood serum
rs1130431	chr6	32661378	HLA-DQB1	2024-09-20	37794183	Nature	Rare variant associations with plasma protein levels in the UK Biobank.	MHC class I polypeptide-related sequence B_A levels	chr6:32661378-?		1	NR	1e-300	300		0.350117	[-0.367655127--0.33257894] unit decrease	NR [617073]
rs1130431	chr6	32661378	HLA-DQB1	2024-09-20	37794183	Nature	Rare variant associations with plasma protein levels in the UK Biobank.	Retinol-binding protein 1 levels	chr6:32661378-?		1	NR	6e-15	14.2218	(genotypic)	0.0724557	[-0.090631309--0.054280074] unit decrease	NR [617073]	level of retinol-binding protein 1 in blood serum
rs1049088	chr6	32662091	HLA-DQB1	2024-09-20	37794183	Nature	Rare variant associations with plasma protein levels in the UK Biobank.	SREBP regulating gene protein levels	chr6:32662091-?		1	NR	2e-15	14.699	(dominant)	0.0856685	[-0.106763547--0.064573365] unit decrease	NR [617073]
rs1049088	chr6	32662091	HLA-DQB1	2024-09-20	37794183	Nature	Rare variant associations with plasma protein levels in the UK Biobank.	V-set and transmembrane domain-containing protein 2B levels	chr6:32662091-?		1	NR	6e-08	7.22185	(genotypic)	0.050521	[-0.068805721--0.032236272] unit decrease	NR [617073]
rs1049088	chr6	32662091	HLA-DQB1	2024-09-20	37794183	Nature	Rare variant associations with plasma protein levels in the UK Biobank.	Cornifin-B levels	chr6:32662091-?		1	NR	1e-09	9	(dominant)	0.0645328	[-0.085434468--0.043631227] unit decrease	NR [617073]
rs28746806	chr6	32665288	HLA-DQB1	2021-08-24	34021172	Sci Rep	GWAS of allometric body-shape indices in UK Biobank identifies loci suggesting associations with morphogenesis, organogenesis, adrenal cell renewal and cancer.	Hip circumference adjusted for BMI	rs28746806-C	intron_variant	0	NR	1e-14	14		0.0253727	[0.019-0.032] unit decrease	Affymetrix [323123] (imputed)	BMI-adjusted hip circumference
rs28746814	chr6	32665470	HLA-DQB1	2020-09-18	32888494	Cell	The Polygenic and Monogenic Basis of Blood Traits and Diseases.	Eosinophil percentage of white cells	rs28746814-T	intron_variant	0	0.325337	9e-16	15.0458		0.0220208	[0.017-0.027] unit increase	Affymetrix [93095623] (imputed)	eosinophil percentage of leukocytes
rs17220968	chr6	33064886	HLA-DPA1	2024-04-26	38368726	Mol Immunol	Shared genetic architecture between hypothyroidism and rheumatoid arthritis: A large-scale cross-trait analysis.	Hypothyroidism or rheumatoid arthritis (pleiotropy)	rs17220968-?	3_prime_UTR_variant	0	NR	3e-85	84.5229				NR [NR]	rheumatoid arthritis, hypothyroidism
rs17214573	chr6	33064891	HLA-DPA1	2024-04-26	38368726	Mol Immunol	Shared genetic architecture between hypothyroidism and rheumatoid arthritis: A large-scale cross-trait analysis.	Hypothyroidism or rheumatoid arthritis (pleiotropy)	rs17214573-?	3_prime_UTR_variant	0	NR	3e-85	84.5229				NR [NR]	rheumatoid arthritis, hypothyroidism
rs9277341	chr6	33071848	HLA-DPA1	2017-05-11	28029757	Arthritis Rheumatol	Identification of Functional and Expression Polymorphisms Associated With Risk for Antineutrophil Cytoplasmic Autoantibody-Associated Vasculitis.	Antineutrophil cytoplasmic antibody-associated vasculitis	rs9277341-T	intron_variant	0	0.7	6e-71	70.2218		2.44	2.21-2.69	Affymetrix [at least 333035] (imputed)	anti-neutrophil antibody associated vasculitis
rs9277341	chr6	33071848	HLA-DPA1	2024-04-04	38182794	Commun Biol	Multi-ancestry genome-wide meta-analysis identifies novel basal cell carcinoma loci and shared genetic effects with squamous cell carcinoma.	Basal cell carcinoma	rs9277341-C	intron_variant	0	NR	6e-10	9.22185		0.0475617	[0.033-0.063] unit decrease	Affymetrix, Illumina [NR] (imputed)	basal cell carcinoma
rs4345439	chr6	33072321	HLA-DPA1	2021-12-14	34594039	Nat Genet	A cross-population atlas of genetic associations for 220 human phenotypes.	Graves' disease	rs4345439-T	intron_variant	0	0.470482	2e-67	66.699		0.486484	[0.43-0.54] unit increase	Illumina [13429311] (imputed)	Graves disease
rs6415133	chr6	33077210	HLA-DPA1	2017-12-01	28928442	Nat Commun	Genome-wide association and HLA region fine-mapping studies identify susceptibility loci for multiple common infections.	Plantar warts	rs6415133-?	intron_variant	0	NR	6e-16	15.2218		0.0994	[0.075-0.124] unit decrease	Illumina [at least 560000] (imputed)	susceptibility to plantar warts measurement
rs2213309	chr6	33077478	HLA-DPA1	2018-06-29	28584286	Mol Psychiatry	Genome-wide meta-analysis of cognitive empathy: heritability, and correlates with sex, neuropsychiatric conditions and cognition.	Cognitive empathy	rs2213309-T	intron_variant	0	0.55	8e-07	6.09691	(female)	0.1155	[0.07-0.161] unit increase	Illumina [11133794] (imputed)	empathy measurement
rs3135022	chr6	33078189	HLA-DPA1	2018-06-29	28584286	Mol Psychiatry	Genome-wide meta-analysis of cognitive empathy: heritability, and correlates with sex, neuropsychiatric conditions and cognition.	Cognitive empathy	rs3135022-A	intron_variant	0	NR	3e-06	5.52288	(female)	0.1098	[0.064-0.156] unit decrease	Illumina [11133794] (imputed)	empathy measurement
rs9277348	chr6	33080761	HLA-DPA1	2021-12-14	34594039	Nat Genet	A cross-population atlas of genetic associations for 220 human phenotypes.	Hypothyroidism	rs9277348-C	missense_variant	0	0.428106	8e-16	15.0969		0.369292	[0.28-0.46] unit increase	Illumina [13429045] (imputed)	hypothyroidism
rs9277348	chr6	33080761	HLA-DPA1	2024-09-20	37794183	Nature	Rare variant associations with plasma protein levels in the UK Biobank.	Tenascin-X levels	chr6:33080761-?		1	NR	9e-50	49.0458	(genotypic)	0.283029	[0.245667712-0.320390428] unit increase	NR [617073]	level of tenascin-X in blood serum

## Sheet: Table S8
Table S8. Significant eQTL records of WWP2 rs12149320 in the GTEx database.
Gencode ID	Gene symbol	Variant ID	SNP	P-value	NES	Tissue
ENSG00000198373.13	WWP2	chr16_69925918_G_C_b38	rs12149320	3.6e-16	0.49	Brain - Spinal cord (cervical c-1)
ENSG00000198373.13	WWP2	chr16_69925918_G_C_b38	rs12149320	1.8e-09	0.12	Artery - Tibial
ENSG00000198373.13	WWP2	chr16_69925918_G_C_b38	rs12149320	2e-08	0.25	Brain - Cortex
ENSG00000198373.13	WWP2	chr16_69925918_G_C_b38	rs12149320	1.6e-07	0.22	Brain - Cerebellar Hemisphere
ENSG00000198373.13	WWP2	chr16_69925918_G_C_b38	rs12149320	3.5e-07	0.13	Cells - Cultured fibroblasts
ENSG00000198373.13	WWP2	chr16_69925918_G_C_b38	rs12149320	6e-06	0.2	Brain - Hippocampus
ENSG00000198373.13	WWP2	chr16_69925918_G_C_b38	rs12149320	7.2e-06	0.22	Brain - Frontal Cortex (BA9)
ENSG00000198373.13	WWP2	chr16_69925918_G_C_b38	rs12149320	3.8e-05	0.19	Brain - Putamen (basal ganglia)
ENSG00000157322.18	CLEC18A	chr16_69925918_G_C_b38	rs12149320	1.3e-98	-0.58	Whole Blood
ENSG00000157322.18	CLEC18A	chr16_69925918_G_C_b38	rs12149320	2.3e-88	-0.83	Skin - Sun Exposed (Lower leg)
ENSG00000157322.18	CLEC18A	chr16_69925918_G_C_b38	rs12149320	1.3e-86	-0.89	Thyroid
ENSG00000157322.18	CLEC18A	chr16_69925918_G_C_b38	rs12149320	1.2e-83	-0.69	Artery - Tibial
ENSG00000157322.18	CLEC18A	chr16_69925918_G_C_b38	rs12149320	1.3e-75	-0.86	Artery - Aorta
ENSG00000157322.18	CLEC18A	chr16_69925918_G_C_b38	rs12149320	2.1e-73	-0.9	Lung
ENSG00000157322.18	CLEC18A	chr16_69925918_G_C_b38	rs12149320	2e-67	-0.79	Skin - Not Sun Exposed (Suprapubic)
ENSG00000157322.18	CLEC18A	chr16_69925918_G_C_b38	rs12149320	7.7e-63	-0.81	Adipose - Subcutaneous
ENSG00000157322.18	CLEC18A	chr16_69925918_G_C_b38	rs12149320	1.5e-62	-0.81	Esophagus - Mucosa
ENSG00000157322.18	CLEC18A	chr16_69925918_G_C_b38	rs12149320	3.6e-60	-0.81	Nerve - Tibial
ENSG00000157322.18	CLEC18A	chr16_69925918_G_C_b38	rs12149320	1.1e-50	-0.72	Colon - Transverse
ENSG00000157322.18	CLEC18A	chr16_69925918_G_C_b38	rs12149320	5.9e-48	-0.95	Pituitary
ENSG00000157322.18	CLEC18A	chr16_69925918_G_C_b38	rs12149320	2.5e-45	-0.73	Esophagus - Muscularis
ENSG00000157322.18	CLEC18A	chr16_69925918_G_C_b38	rs12149320	3.2e-43	-0.56	Muscle - Skeletal
ENSG00000157322.18	CLEC18A	chr16_69925918_G_C_b38	rs12149320	4.5e-41	-0.71	Adipose - Visceral (Omentum)
ENSG00000157322.18	CLEC18A	chr16_69925918_G_C_b38	rs12149320	1.3e-40	-0.76	Breast - Mammary Tissue
ENSG00000157322.18	CLEC18A	chr16_69925918_G_C_b38	rs12149320	5.4e-40	-0.94	Brain - Caudate (basal ganglia)
ENSG00000157322.18	CLEC18A	chr16_69925918_G_C_b38	rs12149320	1.4e-38	-0.7	Stomach
ENSG00000157322.18	CLEC18A	chr16_69925918_G_C_b38	rs12149320	5.6e-38	-0.99	Brain - Cortex
ENSG00000157322.18	CLEC18A	chr16_69925918_G_C_b38	rs12149320	5.7e-38	-0.85	Brain - Nucleus accumbens (basal ganglia)
ENSG00000157322.18	CLEC18A	chr16_69925918_G_C_b38	rs12149320	4e-35	-0.67	Artery - Coronary
ENSG00000157322.18	CLEC18A	chr16_69925918_G_C_b38	rs12149320	5.9e-34	-0.85	Spleen
ENSG00000157322.18	CLEC18A	chr16_69925918_G_C_b38	rs12149320	2.8e-33	-0.93	Brain - Hypothalamus
ENSG00000157322.18	CLEC18A	chr16_69925918_G_C_b38	rs12149320	1.4e-31	-0.91	Brain - Frontal Cortex (BA9)
ENSG00000157322.18	CLEC18A	chr16_69925918_G_C_b38	rs12149320	4e-31	-0.88	Small Intestine - Terminal Ileum
ENSG00000157322.18	CLEC18A	chr16_69925918_G_C_b38	rs12149320	9.3e-31	-0.82	Pancreas
ENSG00000157322.18	CLEC18A	chr16_69925918_G_C_b38	rs12149320	4e-30	-0.8	Prostate
ENSG00000157322.18	CLEC18A	chr16_69925918_G_C_b38	rs12149320	3.1e-29	-0.88	Brain - Anterior qcingulate cortex (BA24)
ENSG00000157322.18	CLEC18A	chr16_69925918_G_C_b38	rs12149320	4.4e-29	-0.91	Brain - Putamen (basal ganglia)
ENSG00000157322.18	CLEC18A	chr16_69925918_G_C_b38	rs12149320	1.9e-27	-0.88	Brain - Hippocampus
ENSG00000157322.18	CLEC18A	chr16_69925918_G_C_b38	rs12149320	5.2e-26	-0.64	Colon - Sigmoid
ENSG00000157322.18	CLEC18A	chr16_69925918_G_C_b38	rs12149320	1.6e-25	-0.9	Brain - Spinal cord (cervical c-1)
ENSG00000157322.18	CLEC18A	chr16_69925918_G_C_b38	rs12149320	1.9e-21	-0.77	Liver
ENSG00000157322.18	CLEC18A	chr16_69925918_G_C_b38	rs12149320	3e-19	-0.74	Brain - Cerebellum
ENSG00000157322.18	CLEC18A	chr16_69925918_G_C_b38	rs12149320	3.5e-19	-0.84	Brain - Substantia nigra
ENSG00000157322.18	CLEC18A	chr16_69925918_G_C_b38	rs12149320	4.8e-19	-0.66	Brain - Cerebellar Hemisphere
ENSG00000157322.18	CLEC18A	chr16_69925918_G_C_b38	rs12149320	1.3e-18	-0.57	Esophagus - Gastroesophageal Junction
ENSG00000157322.18	CLEC18A	chr16_69925918_G_C_b38	rs12149320	1.5e-18	-0.82	Ovary
ENSG00000157322.18	CLEC18A	chr16_69925918_G_C_b38	rs12149320	6.8e-18	-0.75	Brain - Amygdala
ENSG00000157322.18	CLEC18A	chr16_69925918_G_C_b38	rs12149320	1.1e-17	-0.76	Minor Salivary Gland
ENSG00000157322.18	CLEC18A	chr16_69925918_G_C_b38	rs12149320	4.6e-17	-0.61	Cells - EBV-transformed lymphocytes
ENSG00000157322.18	CLEC18A	chr16_69925918_G_C_b38	rs12149320	7.6e-13	-0.69	Vagina
ENSG00000157322.18	CLEC18A	chr16_69925918_G_C_b38	rs12149320	1.9e-10	-0.72	Uterus
ENSG00000157322.18	CLEC18A	chr16_69925918_G_C_b38	rs12149320	8.3e-10	-0.4	Kidney - Cortex
ENSG00000157322.18	CLEC18A	chr16_69925918_G_C_b38	rs12149320	5.9e-09	-0.69	Bladder
ENSG00000157322.18	CLEC18A	chr16_69925918_G_C_b38	rs12149320	2e-05	0.27	Testis
ENSG00000157335.21	CLEC18C	chr16_69925918_G_C_b38	rs12149320	9.1e-84	0.72	Whole Blood
ENSG00000157335.21	CLEC18C	chr16_69925918_G_C_b38	rs12149320	3e-48	0.73	Lung
ENSG00000157335.21	CLEC18C	chr16_69925918_G_C_b38	rs12149320	2.3e-44	0.67	Thyroid
ENSG00000157335.21	CLEC18C	chr16_69925918_G_C_b38	rs12149320	6.6e-36	0.87	Pituitary
ENSG00000157335.21	CLEC18C	chr16_69925918_G_C_b38	rs12149320	7.4e-36	0.73	Artery - Aorta
ENSG00000157335.21	CLEC18C	chr16_69925918_G_C_b38	rs12149320	9.4e-36	0.56	Artery - Tibial
ENSG00000157335.21	CLEC18C	chr16_69925918_G_C_b38	rs12149320	3.5e-23	0.54	Testis
ENSG00000157335.21	CLEC18C	chr16_69925918_G_C_b38	rs12149320	4.1e-23	0.73	Adrenal Gland
ENSG00000157335.21	CLEC18C	chr16_69925918_G_C_b38	rs12149320	2.6e-22	0.82	Minor Salivary Gland
ENSG00000157335.21	CLEC18C	chr16_69925918_G_C_b38	rs12149320	1.8e-21	-0.47	Nerve - Tibial
ENSG00000157335.21	CLEC18C	chr16_69925918_G_C_b38	rs12149320	2.4e-19	0.73	Spleen
ENSG00000157335.21	CLEC18C	chr16_69925918_G_C_b38	rs12149320	2e-14	0.56	Artery - Coronary
ENSG00000157335.21	CLEC18C	chr16_69925918_G_C_b38	rs12149320	1.4e-12	0.62	Small Intestine - Terminal Ileum
ENSG00000157335.21	CLEC18C	chr16_69925918_G_C_b38	rs12149320	7.5e-12	0.52	Prostate
ENSG00000157335.21	CLEC18C	chr16_69925918_G_C_b38	rs12149320	1.7e-11	0.35	Esophagus - Mucosa
ENSG00000157335.21	CLEC18C	chr16_69925918_G_C_b38	rs12149320	9.8e-11	0.52	Brain - Cortex
ENSG00000157335.21	CLEC18C	chr16_69925918_G_C_b38	rs12149320	1.8e-06	0.41	Brain - Hypothalamus
ENSG00000157335.21	CLEC18C	chr16_69925918_G_C_b38	rs12149320	5.1e-06	-0.3	Kidney - Cortex
ENSG00000157335.21	CLEC18C	chr16_69925918_G_C_b38	rs12149320	1.5e-05	0.34	Brain - Caudate (basal ganglia)
ENSG00000090861.17	AARS1	chr16_69925918_G_C_b38	rs12149320	3.5e-17	-0.24	Muscle - Skeletal
ENSG00000090861.17	AARS1	chr16_69925918_G_C_b38	rs12149320	5.7e-09	0.27	Pituitary
ENSG00000090861.17	AARS1	chr16_69925918_G_C_b38	rs12149320	5.3e-08	0.11	Cells - Cultured fibroblasts
ENSG00000090861.17	AARS1	chr16_69925918_G_C_b38	rs12149320	3.9e-06	0.22	Brain - Cerebellum
ENSG00000090861.17	AARS1	chr16_69925918_G_C_b38	rs12149320	5.9e-06	0.14	Brain - Hypothalamus
ENSG00000090861.17	AARS1	chr16_69925918_G_C_b38	rs12149320	3.8e-05	0.22	Brain - Spinal cord (cervical c-1)
ENSG00000090861.17	AARS1	chr16_69925918_G_C_b38	rs12149320	0.00012	0.1	Brain - Cortex
ENSG00000090861.17	AARS1	chr16_69925918_G_C_b38	rs12149320	0.00014	0.098	Esophagus - Mucosa
ENSG00000090861.17	AARS1	chr16_69925918_G_C_b38	rs12149320	0.00016	0.12	Brain - Caudate (basal ganglia)
ENSG00000090861.17	AARS1	chr16_69925918_G_C_b38	rs12149320	0.00021	0.14	Brain - Cerebellar Hemisphere
ENSG00000103051.20	COG4	chr16_69925918_G_C_b38	rs12149320	1.4e-07	0.1	Muscle - Skeletal
ENSG00000103051.20	COG4	chr16_69925918_G_C_b38	rs12149320	6.7e-07	-0.087	Whole Blood
ENSG00000103051.20	COG4	chr16_69925918_G_C_b38	rs12149320	1.6e-06	-0.17	Testis
ENSG00000103051.20	COG4	chr16_69925918_G_C_b38	rs12149320	2.2e-06	0.1	Esophagus - Mucosa
ENSG00000103051.20	COG4	chr16_69925918_G_C_b38	rs12149320	2.4e-05	0.093	Skin - Not Sun Exposed (Suprapubic)
ENSG00000103051.20	COG4	chr16_69925918_G_C_b38	rs12149320	4.9e-05	0.085	Cells - Cultured fibroblasts
ENSG00000247228.3	ENSG00000247228	chr16_69925918_G_C_b38	rs12149320	3.4e-21	0.62	Testis
ENSG00000223496.3	EXOSC6	chr16_69925918_G_C_b38	rs12149320	6.7e-77	-0.69	Artery - Tibial
ENSG00000223496.3	EXOSC6	chr16_69925918_G_C_b38	rs12149320	7.4e-76	-0.7	Muscle - Skeletal
ENSG00000223496.3	EXOSC6	chr16_69925918_G_C_b38	rs12149320	6.5e-72	-0.56	Skin - Sun Exposed (Lower leg)
ENSG00000223496.3	EXOSC6	chr16_69925918_G_C_b38	rs12149320	6.7e-72	-0.7	Nerve - Tibial
ENSG00000223496.3	EXOSC6	chr16_69925918_G_C_b38	rs12149320	4.7e-66	-0.63	Adipose - Subcutaneous
ENSG00000223496.3	EXOSC6	chr16_69925918_G_C_b38	rs12149320	2.9e-57	-0.55	Lung
ENSG00000223496.3	EXOSC6	chr16_69925918_G_C_b38	rs12149320	1.5e-54	-0.46	Skin - Not Sun Exposed (Suprapubic)
ENSG00000223496.3	EXOSC6	chr16_69925918_G_C_b38	rs12149320	2.9e-51	-0.55	Adipose - Visceral (Omentum)
ENSG00000223496.3	EXOSC6	chr16_69925918_G_C_b38	rs12149320	4e-48	-0.49	Thyroid
ENSG00000223496.3	EXOSC6	chr16_69925918_G_C_b38	rs12149320	7.9e-47	-0.68	Artery - Aorta
ENSG00000223496.3	EXOSC6	chr16_69925918_G_C_b38	rs12149320	8.4e-45	-0.74	Heart - Atrial Appendage
ENSG00000223496.3	EXOSC6	chr16_69925918_G_C_b38	rs12149320	2.7e-44	-0.59	Breast - Mammary Tissue
ENSG00000223496.3	EXOSC6	chr16_69925918_G_C_b38	rs12149320	2e-43	-0.56	Esophagus - Muscularis
ENSG00000223496.3	EXOSC6	chr16_69925918_G_C_b38	rs12149320	2.4e-43	-0.47	Esophagus - Mucosa
ENSG00000223496.3	EXOSC6	chr16_69925918_G_C_b38	rs12149320	8.8e-41	-0.62	Colon - Sigmoid
ENSG00000223496.3	EXOSC6	chr16_69925918_G_C_b38	rs12149320	1.4e-40	-0.61	Colon - Transverse
ENSG00000223496.3	EXOSC6	chr16_69925918_G_C_b38	rs12149320	7.8e-39	-0.8	Pituitary
ENSG00000223496.3	EXOSC6	chr16_69925918_G_C_b38	rs12149320	2.9e-32	-0.49	Brain - Nucleus accumbens (basal ganglia)
ENSG00000223496.3	EXOSC6	chr16_69925918_G_C_b38	rs12149320	3.9e-32	-0.66	Heart - Left Ventricle
ENSG00000223496.3	EXOSC6	chr16_69925918_G_C_b38	rs12149320	7.7e-32	-0.27	Whole Blood
ENSG00000223496.3	EXOSC6	chr16_69925918_G_C_b38	rs12149320	1.5e-31	-0.58	Brain - Cortex
ENSG00000223496.3	EXOSC6	chr16_69925918_G_C_b38	rs12149320	3e-31	-0.55	Brain - Putamen (basal ganglia)
ENSG00000223496.3	EXOSC6	chr16_69925918_G_C_b38	rs12149320	6.3e-31	-0.67	Brain - Cerebellum
ENSG00000223496.3	EXOSC6	chr16_69925918_G_C_b38	rs12149320	1.8e-30	-0.45	Brain - Caudate (basal ganglia)
ENSG00000223496.3	EXOSC6	chr16_69925918_G_C_b38	rs12149320	1.2e-29	-0.57	Esophagus - Gastroesophageal Junction
ENSG00000223496.3	EXOSC6	chr16_69925918_G_C_b38	rs12149320	1.5e-28	-0.62	Brain - Cerebellar Hemisphere
ENSG00000223496.3	EXOSC6	chr16_69925918_G_C_b38	rs12149320	6.8e-28	-0.3	Cells - Cultured fibroblasts
ENSG00000223496.3	EXOSC6	chr16_69925918_G_C_b38	rs12149320	7.5e-28	-0.54	Brain - Hypothalamus
ENSG00000223496.3	EXOSC6	chr16_69925918_G_C_b38	rs12149320	6.3e-27	-0.53	Brain - Hippocampus
ENSG00000223496.3	EXOSC6	chr16_69925918_G_C_b38	rs12149320	2e-26	-0.56	Brain - Anterior qcingulate cortex (BA24)
ENSG00000223496.3	EXOSC6	chr16_69925918_G_C_b38	rs12149320	1.7e-25	-0.61	Pancreas
ENSG00000223496.3	EXOSC6	chr16_69925918_G_C_b38	rs12149320	3e-25	-0.74	Brain - Spinal cord (cervical c-1)
ENSG00000223496.3	EXOSC6	chr16_69925918_G_C_b38	rs12149320	1.8e-24	-0.58	Stomach
ENSG00000223496.3	EXOSC6	chr16_69925918_G_C_b38	rs12149320	2.3e-22	-0.59	Prostate
ENSG00000223496.3	EXOSC6	chr16_69925918_G_C_b38	rs12149320	3.9e-21	-0.45	Brain - Frontal Cortex (BA9)
ENSG00000223496.3	EXOSC6	chr16_69925918_G_C_b38	rs12149320	1e-20	-0.68	Ovary
ENSG00000223496.3	EXOSC6	chr16_69925918_G_C_b38	rs12149320	3.1e-20	-0.61	Brain - Amygdala
ENSG00000223496.3	EXOSC6	chr16_69925918_G_C_b38	rs12149320	1.6e-19	-0.58	Spleen
ENSG00000223496.3	EXOSC6	chr16_69925918_G_C_b38	rs12149320	8.8e-19	-0.62	Small Intestine - Terminal Ileum
ENSG00000223496.3	EXOSC6	chr16_69925918_G_C_b38	rs12149320	4.8e-17	-0.56	Adrenal Gland
ENSG00000223496.3	EXOSC6	chr16_69925918_G_C_b38	rs12149320	9e-17	-0.56	Vagina
ENSG00000223496.3	EXOSC6	chr16_69925918_G_C_b38	rs12149320	2.5e-15	-0.45	Brain - Substantia nigra
ENSG00000223496.3	EXOSC6	chr16_69925918_G_C_b38	rs12149320	2.7e-15	-0.51	Artery - Coronary
ENSG00000223496.3	EXOSC6	chr16_69925918_G_C_b38	rs12149320	2.8e-15	-0.67	Uterus
ENSG00000223496.3	EXOSC6	chr16_69925918_G_C_b38	rs12149320	3e-14	-0.22	Testis
ENSG00000223496.3	EXOSC6	chr16_69925918_G_C_b38	rs12149320	2.4e-12	-0.79	Kidney - Cortex
ENSG00000223496.3	EXOSC6	chr16_69925918_G_C_b38	rs12149320	6.2e-11	-0.43	Liver
ENSG00000223496.3	EXOSC6	chr16_69925918_G_C_b38	rs12149320	4.4e-10	-0.26	Cells - EBV-transformed lymphocytes
ENSG00000223496.3	EXOSC6	chr16_69925918_G_C_b38	rs12149320	1.2e-08	-0.51	Minor Salivary Gland
ENSG00000223496.3	EXOSC6	chr16_69925918_G_C_b38	rs12149320	9.8e-08	-0.83	Bladder
ENSG00000157353.17	FCSK	chr16_69925918_G_C_b38	rs12149320	5.1e-05	-0.092	Skin - Sun Exposed (Lower leg)
ENSG00000157368.12	IL34	chr16_69925918_G_C_b38	rs12149320	2.9e-07	-0.11	Nerve - Tibial
ENSG00000157368.12	IL34	chr16_69925918_G_C_b38	rs12149320	1.5e-06	-0.098	Adipose - Subcutaneous
ENSG00000157368.12	IL34	chr16_69925918_G_C_b38	rs12149320	1.2e-05	0.21	Lung
ENSG00000157368.12	IL34	chr16_69925918_G_C_b38	rs12149320	1.4e-05	-0.078	Esophagus - Mucosa
ENSG00000157368.12	IL34	chr16_69925918_G_C_b38	rs12149320	0.00019	-0.099	Adipose - Visceral (Omentum)
ENSG00000141101.13	NOB1	chr16_69925918_G_C_b38	rs12149320	5.2e-05	0.1	Testis
ENSG00000226232.8	NPIPB14P	chr16_69925918_G_C_b38	rs12149320	1.4e-52	-0.45	Adipose - Subcutaneous
ENSG00000226232.8	NPIPB14P	chr16_69925918_G_C_b38	rs12149320	1e-44	-0.58	Testis
ENSG00000226232.8	NPIPB14P	chr16_69925918_G_C_b38	rs12149320	3.6e-40	-0.32	Skin - Sun Exposed (Lower leg)
ENSG00000226232.8	NPIPB14P	chr16_69925918_G_C_b38	rs12149320	2.9e-38	-0.42	Muscle - Skeletal
ENSG00000226232.8	NPIPB14P	chr16_69925918_G_C_b38	rs12149320	7.4e-38	-0.4	Thyroid
ENSG00000226232.8	NPIPB14P	chr16_69925918_G_C_b38	rs12149320	4.2e-29	-0.3	Skin - Not Sun Exposed (Suprapubic)
ENSG00000226232.8	NPIPB14P	chr16_69925918_G_C_b38	rs12149320	1.6e-27	-0.4	Breast - Mammary Tissue
ENSG00000226232.8	NPIPB14P	chr16_69925918_G_C_b38	rs12149320	3.2e-24	-0.35	Lung
ENSG00000226232.8	NPIPB14P	chr16_69925918_G_C_b38	rs12149320	1.1e-21	-0.32	Stomach
ENSG00000226232.8	NPIPB14P	chr16_69925918_G_C_b38	rs12149320	5.5e-19	-0.43	Pancreas
ENSG00000226232.8	NPIPB14P	chr16_69925918_G_C_b38	rs12149320	2.2e-17	-0.29	Nerve - Tibial
ENSG00000226232.8	NPIPB14P	chr16_69925918_G_C_b38	rs12149320	1.6e-16	-0.33	Adipose - Visceral (Omentum)
ENSG00000226232.8	NPIPB14P	chr16_69925918_G_C_b38	rs12149320	2.3e-13	-0.19	Colon - Transverse
ENSG00000226232.8	NPIPB14P	chr16_69925918_G_C_b38	rs12149320	2.4e-13	-0.28	Artery - Aorta
ENSG00000226232.8	NPIPB14P	chr16_69925918_G_C_b38	rs12149320	1.1e-12	-0.32	Minor Salivary Gland
ENSG00000226232.8	NPIPB14P	chr16_69925918_G_C_b38	rs12149320	5.4e-12	-0.23	Cells - Cultured fibroblasts
ENSG00000226232.8	NPIPB14P	chr16_69925918_G_C_b38	rs12149320	6.8e-11	-0.32	Adrenal Gland
ENSG00000226232.8	NPIPB14P	chr16_69925918_G_C_b38	rs12149320	7.5e-11	-0.2	Artery - Tibial
ENSG00000226232.8	NPIPB14P	chr16_69925918_G_C_b38	rs12149320	3.7e-08	-0.19	Esophagus - Mucosa
ENSG00000226232.8	NPIPB14P	chr16_69925918_G_C_b38	rs12149320	4.9e-08	-0.32	Spleen
ENSG00000226232.8	NPIPB14P	chr16_69925918_G_C_b38	rs12149320	5.8e-08	-0.19	Small Intestine - Terminal Ileum
ENSG00000226232.8	NPIPB14P	chr16_69925918_G_C_b38	rs12149320	1.1e-07	-0.18	Esophagus - Muscularis
ENSG00000226232.8	NPIPB14P	chr16_69925918_G_C_b38	rs12149320	1.6e-07	-0.14	Whole Blood
ENSG00000226232.8	NPIPB14P	chr16_69925918_G_C_b38	rs12149320	3.5e-06	-0.27	Cells - EBV-transformed lymphocytes
ENSG00000226232.8	NPIPB14P	chr16_69925918_G_C_b38	rs12149320	4e-06	-0.19	Heart - Atrial Appendage
ENSG00000226232.8	NPIPB14P	chr16_69925918_G_C_b38	rs12149320	1.3e-05	-0.21	Pituitary
ENSG00000226232.8	NPIPB14P	chr16_69925918_G_C_b38	rs12149320	1.4e-05	-0.3	Ovary
ENSG00000226232.8	NPIPB14P	chr16_69925918_G_C_b38	rs12149320	6.2e-05	-0.17	Heart - Left Ventricle
ENSG00000226232.8	NPIPB14P	chr16_69925918_G_C_b38	rs12149320	7e-05	-0.21	Liver
ENSG00000226232.8	NPIPB14P	chr16_69925918_G_C_b38	rs12149320	0.00021	-0.17	Esophagus - Gastroesophageal Junction
ENSG00000090857.14	PDPR	chr16_69925918_G_C_b38	rs12149320	5e-09	-0.24	Whole Blood
ENSG00000090857.14	PDPR	chr16_69925918_G_C_b38	rs12149320	6.4e-09	-0.26	Skin - Not Sun Exposed (Suprapubic)
ENSG00000090857.14	PDPR	chr16_69925918_G_C_b38	rs12149320	3.1e-07	-0.28	Nerve - Tibial
ENSG00000090857.14	PDPR	chr16_69925918_G_C_b38	rs12149320	1.8e-06	-0.43	Brain - Cerebellum
ENSG00000090857.14	PDPR	chr16_69925918_G_C_b38	rs12149320	2.4e-06	-0.38	Pituitary
ENSG00000090857.14	PDPR	chr16_69925918_G_C_b38	rs12149320	4.8e-06	-0.29	Heart - Atrial Appendage
ENSG00000090857.14	PDPR	chr16_69925918_G_C_b38	rs12149320	8.4e-06	-0.24	Thyroid
ENSG00000090857.14	PDPR	chr16_69925918_G_C_b38	rs12149320	1.2e-05	-0.22	Lung
ENSG00000090857.14	PDPR	chr16_69925918_G_C_b38	rs12149320	1.4e-05	-0.22	Esophagus - Mucosa
ENSG00000090857.14	PDPR	chr16_69925918_G_C_b38	rs12149320	2.4e-05	-0.42	Minor Salivary Gland
ENSG00000090857.14	PDPR	chr16_69925918_G_C_b38	rs12149320	2.6e-05	-0.21	Adipose - Subcutaneous
ENSG00000090857.14	PDPR	chr16_69925918_G_C_b38	rs12149320	4.4e-05	-0.21	Cells - Cultured fibroblasts
ENSG00000090857.14	PDPR	chr16_69925918_G_C_b38	rs12149320	6.1e-05	-0.23	Esophagus - Muscularis
ENSG00000090857.14	PDPR	chr16_69925918_G_C_b38	rs12149320	0.00011	-0.17	Skin - Sun Exposed (Lower leg)
ENSG00000090857.14	PDPR	chr16_69925918_G_C_b38	rs12149320	0.00017	-0.21	Adipose - Visceral (Omentum)
ENSG00000090857.14	PDPR	chr16_69925918_G_C_b38	rs12149320	0.0002	-0.24	Artery - Aorta
ENSG00000090857.14	PDPR	chr16_69925918_G_C_b38	rs12149320	0.00025	-0.18	Artery - Tibial
ENSG00000255185.6	PDXDC2P	chr16_69925918_G_C_b38	rs12149320	9.1e-95	-0.65	Thyroid
ENSG00000255185.6	PDXDC2P	chr16_69925918_G_C_b38	rs12149320	3e-89	-0.64	Nerve - Tibial
ENSG00000255185.6	PDXDC2P	chr16_69925918_G_C_b38	rs12149320	2.5e-87	-0.66	Muscle - Skeletal
ENSG00000255185.6	PDXDC2P	chr16_69925918_G_C_b38	rs12149320	1.6e-83	-0.66	Adipose - Subcutaneous
ENSG00000255185.6	PDXDC2P	chr16_69925918_G_C_b38	rs12149320	4.9e-78	-0.56	Skin - Sun Exposed (Lower leg)
ENSG00000255185.6	PDXDC2P	chr16_69925918_G_C_b38	rs12149320	7.2e-73	-0.56	Skin - Not Sun Exposed (Suprapubic)
ENSG00000255185.6	PDXDC2P	chr16_69925918_G_C_b38	rs12149320	1.5e-71	-0.54	Esophagus - Muscularis
ENSG00000255185.6	PDXDC2P	chr16_69925918_G_C_b38	rs12149320	2.1e-70	-0.59	Lung
ENSG00000255185.6	PDXDC2P	chr16_69925918_G_C_b38	rs12149320	1.9e-65	-0.67	Adipose - Visceral (Omentum)
ENSG00000255185.6	PDXDC2P	chr16_69925918_G_C_b38	rs12149320	2e-63	-0.5	Artery - Tibial
ENSG00000255185.6	PDXDC2P	chr16_69925918_G_C_b38	rs12149320	2.1e-62	-0.65	Artery - Aorta
ENSG00000255185.6	PDXDC2P	chr16_69925918_G_C_b38	rs12149320	1.2e-58	-0.64	Breast - Mammary Tissue
ENSG00000255185.6	PDXDC2P	chr16_69925918_G_C_b38	rs12149320	5.7e-57	-0.65	Pituitary
ENSG00000255185.6	PDXDC2P	chr16_69925918_G_C_b38	rs12149320	8.1e-55	-0.48	Cells - Cultured fibroblasts
ENSG00000255185.6	PDXDC2P	chr16_69925918_G_C_b38	rs12149320	1.6e-51	-0.62	Heart - Atrial Appendage
ENSG00000255185.6	PDXDC2P	chr16_69925918_G_C_b38	rs12149320	1.7e-50	-0.39	Esophagus - Mucosa
ENSG00000255185.6	PDXDC2P	chr16_69925918_G_C_b38	rs12149320	4.8e-49	-0.39	Colon - Transverse
ENSG00000255185.6	PDXDC2P	chr16_69925918_G_C_b38	rs12149320	2.1e-44	-0.62	Heart - Left Ventricle
ENSG00000255185.6	PDXDC2P	chr16_69925918_G_C_b38	rs12149320	2e-42	-0.49	Stomach
ENSG00000255185.6	PDXDC2P	chr16_69925918_G_C_b38	rs12149320	2.5e-41	-0.4	Colon - Sigmoid
ENSG00000255185.6	PDXDC2P	chr16_69925918_G_C_b38	rs12149320	4e-41	-0.65	Pancreas
ENSG00000255185.6	PDXDC2P	chr16_69925918_G_C_b38	rs12149320	1.1e-37	-0.49	Esophagus - Gastroesophageal Junction
ENSG00000255185.6	PDXDC2P	chr16_69925918_G_C_b38	rs12149320	3.6e-37	-0.7	Adrenal Gland
ENSG00000255185.6	PDXDC2P	chr16_69925918_G_C_b38	rs12149320	1.7e-36	-0.65	Testis
ENSG00000255185.6	PDXDC2P	chr16_69925918_G_C_b38	rs12149320	9.4e-33	-0.62	Brain - Cerebellum
ENSG00000255185.6	PDXDC2P	chr16_69925918_G_C_b38	rs12149320	3.3e-30	-0.45	Brain - Cerebellar Hemisphere
ENSG00000255185.6	PDXDC2P	chr16_69925918_G_C_b38	rs12149320	2.3e-28	-0.69	Brain - Cortex
ENSG00000255185.6	PDXDC2P	chr16_69925918_G_C_b38	rs12149320	8.5e-28	-0.57	Artery - Coronary
ENSG00000255185.6	PDXDC2P	chr16_69925918_G_C_b38	rs12149320	3.6e-27	-0.49	Prostate
ENSG00000255185.6	PDXDC2P	chr16_69925918_G_C_b38	rs12149320	2e-26	-0.26	Whole Blood
ENSG00000255185.6	PDXDC2P	chr16_69925918_G_C_b38	rs12149320	5.3e-25	-0.5	Spleen
ENSG00000255185.6	PDXDC2P	chr16_69925918_G_C_b38	rs12149320	8.2e-25	-0.49	Brain - Caudate (basal ganglia)
ENSG00000255185.6	PDXDC2P	chr16_69925918_G_C_b38	rs12149320	8.4e-24	-0.52	Brain - Hypothalamus
ENSG00000255185.6	PDXDC2P	chr16_69925918_G_C_b38	rs12149320	1.6e-23	-0.53	Liver
ENSG00000255185.6	PDXDC2P	chr16_69925918_G_C_b38	rs12149320	2.8e-22	-0.48	Brain - Frontal Cortex (BA9)
ENSG00000255185.6	PDXDC2P	chr16_69925918_G_C_b38	rs12149320	1.3e-20	-0.44	Cells - EBV-transformed lymphocytes
ENSG00000255185.6	PDXDC2P	chr16_69925918_G_C_b38	rs12149320	2e-19	-0.47	Brain - Hippocampus
ENSG00000255185.6	PDXDC2P	chr16_69925918_G_C_b38	rs12149320	1.5e-18	-0.56	Brain - Spinal cord (cervical c-1)
ENSG00000255185.6	PDXDC2P	chr16_69925918_G_C_b38	rs12149320	3.7e-18	-0.46	Brain - Anterior qcingulate cortex (BA24)
ENSG00000255185.6	PDXDC2P	chr16_69925918_G_C_b38	rs12149320	5.6e-18	-0.59	Ovary
ENSG00000255185.6	PDXDC2P	chr16_69925918_G_C_b38	rs12149320	1.5e-17	-0.43	Minor Salivary Gland
ENSG00000255185.6	PDXDC2P	chr16_69925918_G_C_b38	rs12149320	7.4e-17	-0.33	Small Intestine - Terminal Ileum
ENSG00000255185.6	PDXDC2P	chr16_69925918_G_C_b38	rs12149320	5.1e-16	-0.58	Uterus
ENSG00000255185.6	PDXDC2P	chr16_69925918_G_C_b38	rs12149320	2e-15	-0.45	Brain - Putamen (basal ganglia)
ENSG00000255185.6	PDXDC2P	chr16_69925918_G_C_b38	rs12149320	3.3e-15	-0.55	Vagina
ENSG00000255185.6	PDXDC2P	chr16_69925918_G_C_b38	rs12149320	4.7e-13	-0.32	Brain - Nucleus accumbens (basal ganglia)
ENSG00000255185.6	PDXDC2P	chr16_69925918_G_C_b38	rs12149320	1e-10	-0.52	Kidney - Cortex
ENSG00000255185.6	PDXDC2P	chr16_69925918_G_C_b38	rs12149320	2.5e-10	-0.44	Brain - Substantia nigra
ENSG00000255185.6	PDXDC2P	chr16_69925918_G_C_b38	rs12149320	7.5e-07	-0.29	Brain - Amygdala
ENSG00000255185.6	PDXDC2P	chr16_69925918_G_C_b38	rs12149320	8.5e-06	-0.56	Bladder
ENSG00000189091.13	SF3B3	chr16_69925918_G_C_b38	rs12149320	3.4e-14	0.12	Skin - Sun Exposed (Lower leg)
ENSG00000189091.13	SF3B3	chr16_69925918_G_C_b38	rs12149320	1.5e-10	0.19	Artery - Aorta
ENSG00000189091.13	SF3B3	chr16_69925918_G_C_b38	rs12149320	5.6e-10	0.11	Lung
ENSG00000189091.13	SF3B3	chr16_69925918_G_C_b38	rs12149320	4.4e-09	0.12	Artery - Tibial
ENSG00000189091.13	SF3B3	chr16_69925918_G_C_b38	rs12149320	8.1e-09	0.09	Adipose - Subcutaneous
ENSG00000189091.13	SF3B3	chr16_69925918_G_C_b38	rs12149320	2e-08	0.078	Nerve - Tibial
ENSG00000189091.13	SF3B3	chr16_69925918_G_C_b38	rs12149320	1.6e-07	0.097	Skin - Not Sun Exposed (Suprapubic)
ENSG00000189091.13	SF3B3	chr16_69925918_G_C_b38	rs12149320	3e-07	0.093	Thyroid
ENSG00000189091.13	SF3B3	chr16_69925918_G_C_b38	rs12149320	4.3e-07	0.12	Esophagus - Mucosa
ENSG00000189091.13	SF3B3	chr16_69925918_G_C_b38	rs12149320	1.8e-06	0.16	Brain - Cerebellar Hemisphere
ENSG00000189091.13	SF3B3	chr16_69925918_G_C_b38	rs12149320	1.2e-05	0.1	Esophagus - Gastroesophageal Junction
ENSG00000189091.13	SF3B3	chr16_69925918_G_C_b38	rs12149320	1.3e-05	0.16	Brain - Cerebellum
ENSG00000189091.13	SF3B3	chr16_69925918_G_C_b38	rs12149320	5.8e-05	0.074	Esophagus - Muscularis
ENSG00000189091.13	SF3B3	chr16_69925918_G_C_b38	rs12149320	8.4e-05	0.079	Heart - Left Ventricle
ENSG00000189091.13	SF3B3	chr16_69925918_G_C_b38	rs12149320	0.0001	0.077	Adipose - Visceral (Omentum)
ENSG00000189091.13	SF3B3	chr16_69925918_G_C_b38	rs12149320	0.00011	0.093	Heart - Atrial Appendage
ENSG00000189091.13	SF3B3	chr16_69925918_G_C_b38	rs12149320	0.00013	-0.046	Cells - Cultured fibroblasts
ENSG00000189091.13	SF3B3	chr16_69925918_G_C_b38	rs12149320	0.00014	0.083	Breast - Mammary Tissue
ENSG00000261556.10	SMG1P7	chr16_69925918_G_C_b38	rs12149320	2.7e-58	-0.59	Nerve - Tibial
ENSG00000261556.10	SMG1P7	chr16_69925918_G_C_b38	rs12149320	3.4e-56	-0.47	Muscle - Skeletal
ENSG00000261556.10	SMG1P7	chr16_69925918_G_C_b38	rs12149320	2e-49	-0.47	Artery - Tibial
ENSG00000261556.10	SMG1P7	chr16_69925918_G_C_b38	rs12149320	3.6e-42	-0.33	Skin - Sun Exposed (Lower leg)
ENSG00000261556.10	SMG1P7	chr16_69925918_G_C_b38	rs12149320	1.6e-37	-0.4	Lung
ENSG00000261556.10	SMG1P7	chr16_69925918_G_C_b38	rs12149320	6.7e-37	-0.32	Skin - Not Sun Exposed (Suprapubic)
ENSG00000261556.10	SMG1P7	chr16_69925918_G_C_b38	rs12149320	7.2e-35	-0.48	Colon - Transverse
ENSG00000261556.10	SMG1P7	chr16_69925918_G_C_b38	rs12149320	1.4e-34	-0.42	Adipose - Subcutaneous
ENSG00000261556.10	SMG1P7	chr16_69925918_G_C_b38	rs12149320	2.2e-33	-0.48	Heart - Atrial Appendage
ENSG00000261556.10	SMG1P7	chr16_69925918_G_C_b38	rs12149320	2.3e-31	-0.37	Thyroid
ENSG00000261556.10	SMG1P7	chr16_69925918_G_C_b38	rs12149320	3.7e-31	-0.48	Artery - Aorta
ENSG00000261556.10	SMG1P7	chr16_69925918_G_C_b38	rs12149320	4.6e-30	-0.38	Esophagus - Muscularis
ENSG00000261556.10	SMG1P7	chr16_69925918_G_C_b38	rs12149320	4.9e-29	-0.41	Adipose - Visceral (Omentum)
ENSG00000261556.10	SMG1P7	chr16_69925918_G_C_b38	rs12149320	3.4e-28	-0.45	Colon - Sigmoid
ENSG00000261556.10	SMG1P7	chr16_69925918_G_C_b38	rs12149320	6.9e-27	-0.32	Whole Blood
ENSG00000261556.10	SMG1P7	chr16_69925918_G_C_b38	rs12149320	1e-25	-0.42	Breast - Mammary Tissue
ENSG00000261556.10	SMG1P7	chr16_69925918_G_C_b38	rs12149320	1.7e-23	-0.42	Esophagus - Gastroesophageal Junction
ENSG00000261556.10	SMG1P7	chr16_69925918_G_C_b38	rs12149320	1.5e-22	-0.53	Brain - Cerebellum
ENSG00000261556.10	SMG1P7	chr16_69925918_G_C_b38	rs12149320	3.1e-21	-0.38	Brain - Cerebellar Hemisphere
ENSG00000261556.10	SMG1P7	chr16_69925918_G_C_b38	rs12149320	1.6e-20	-0.57	Brain - Spinal cord (cervical c-1)
ENSG00000261556.10	SMG1P7	chr16_69925918_G_C_b38	rs12149320	2.4e-20	-0.48	Brain - Putamen (basal ganglia)
ENSG00000261556.10	SMG1P7	chr16_69925918_G_C_b38	rs12149320	5.9e-20	-0.47	Pituitary
ENSG00000261556.10	SMG1P7	chr16_69925918_G_C_b38	rs12149320	2.1e-19	-0.39	Brain - Frontal Cortex (BA9)
ENSG00000261556.10	SMG1P7	chr16_69925918_G_C_b38	rs12149320	2.6e-19	-0.42	Brain - Caudate (basal ganglia)
ENSG00000261556.10	SMG1P7	chr16_69925918_G_C_b38	rs12149320	2.6e-19	-0.4	Heart - Left Ventricle
ENSG00000261556.10	SMG1P7	chr16_69925918_G_C_b38	rs12149320	4.5e-19	-0.26	Esophagus - Mucosa
ENSG00000261556.10	SMG1P7	chr16_69925918_G_C_b38	rs12149320	7.8e-19	-0.43	Brain - Cortex
ENSG00000261556.10	SMG1P7	chr16_69925918_G_C_b38	rs12149320	8.9e-19	-0.41	Stomach
ENSG00000261556.10	SMG1P7	chr16_69925918_G_C_b38	rs12149320	3.5e-18	-0.37	Brain - Nucleus accumbens (basal ganglia)
ENSG00000261556.10	SMG1P7	chr16_69925918_G_C_b38	rs12149320	9.5e-18	-0.43	Brain - Hippocampus
ENSG00000261556.10	SMG1P7	chr16_69925918_G_C_b38	rs12149320	8.2e-16	-0.42	Prostate
ENSG00000261556.10	SMG1P7	chr16_69925918_G_C_b38	rs12149320	1.2e-15	-0.4	Brain - Hypothalamus
ENSG00000261556.10	SMG1P7	chr16_69925918_G_C_b38	rs12149320	3.1e-15	-0.38	Pancreas
ENSG00000261556.10	SMG1P7	chr16_69925918_G_C_b38	rs12149320	5.6e-15	-0.38	Brain - Anterior qcingulate cortex (BA24)
ENSG00000261556.10	SMG1P7	chr16_69925918_G_C_b38	rs12149320	3.7e-14	-0.17	Cells - Cultured fibroblasts
ENSG00000261556.10	SMG1P7	chr16_69925918_G_C_b38	rs12149320	6e-14	-0.33	Adrenal Gland
ENSG00000261556.10	SMG1P7	chr16_69925918_G_C_b38	rs12149320	1.7e-13	-0.41	Artery - Coronary
ENSG00000261556.10	SMG1P7	chr16_69925918_G_C_b38	rs12149320	2.2e-13	-0.38	Ovary
ENSG00000261556.10	SMG1P7	chr16_69925918_G_C_b38	rs12149320	3.7e-13	-0.36	Spleen
ENSG00000261556.10	SMG1P7	chr16_69925918_G_C_b38	rs12149320	3.7e-12	-0.42	Brain - Amygdala
ENSG00000261556.10	SMG1P7	chr16_69925918_G_C_b38	rs12149320	3.9e-12	-0.41	Vagina
ENSG00000261556.10	SMG1P7	chr16_69925918_G_C_b38	rs12149320	9.5e-11	-0.3	Small Intestine - Terminal Ileum
ENSG00000261556.10	SMG1P7	chr16_69925918_G_C_b38	rs12149320	1.4e-10	-0.43	Uterus
ENSG00000261556.10	SMG1P7	chr16_69925918_G_C_b38	rs12149320	2.8e-10	-0.39	Minor Salivary Gland
ENSG00000261556.10	SMG1P7	chr16_69925918_G_C_b38	rs12149320	1.9e-09	-0.56	Kidney - Cortex
ENSG00000261556.10	SMG1P7	chr16_69925918_G_C_b38	rs12149320	4.5e-08	-0.33	Brain - Substantia nigra
ENSG00000261556.10	SMG1P7	chr16_69925918_G_C_b38	rs12149320	2.6e-06	-0.2	Testis
ENSG00000261556.10	SMG1P7	chr16_69925918_G_C_b38	rs12149320	2.3e-05	-0.21	Cells - EBV-transformed lymphocytes

## Sheet: Table S9
Table S9. Most significant record per gene regulated by WWP2 rs12149320 in ImmuNexUT.
Gene symbol	SNP	Cell type	Chr	Pos	eQTL P-value	eQTL effect beta
PDXDC2P	rs12149320	Mem_CD4	chr16	69925918	3.00061e-23	-0.468833
NPIPB14P	rs12149320	Th1	chr16	69925918	5.64764e-22	-0.445479
EXOSC6	rs12149320	CL_Mono	chr16	69925918	7.63687e-12	-0.443687
COG4	rs12149320	CD16p_Mono	chr16	69925918	3.66044e-07	0.266663
SMG1P7	rs12149320	mDC	chr16	69925918	7.3333e-07	-0.27002
CLEC18A	rs12149320	Neu	chr16	69925918	4.9047e-06	-0.300041
FUK	rs12149320	CD16p_Mono	chr16	69925918	8.25339e-06	-0.259682

## Sheet: Tasble S10
Table S10. Population-Specific Selected SNPs Associated with Viral Read Counts after Linear Regression Adjustment.
Gene	SNP	Chr	Pos	Model	Coef	P-value(FRD)	-log10(FDR)
PTPRF	rs546548045	chr1	43582577	recessive	2.27358	0.00560404	2.2515
ENSG00000260971	rs114330705	chr1	56317171	recessive	2.38488	0.0424787	1.37183
FYB2	rs117047893	chr1	56732324	recessive	1.75937	0.0424787	1.37183
FYB2	rs4142211	chr1	56797179	recessive	1.92878	0.0132846	1.87665
TADA1	rs2049909	chr1	166862708	additive	0.936989	0.0424787	1.37183
TADA1	rs2049910	chr1	166862888	additive	0.936989	0.0424787	1.37183
PRKCH	rs17098310	chr14	61410377	additive	1.07042	0.0355105	1.44964
PRKCH	rs6573391	chr14	61410736	additive	1.07042	0.0355105	1.44964
ALDH1A2	rs34492002	chr15	58379610	recessive	2.35686	0.0424787	1.37183
ALDH1A2	rs12908733	chr15	58386598	recessive	2.35686	0.0424787	1.37183
ALDH1A2	rs78060277	chr15	58394311	recessive	2.35686	0.0424787	1.37183
ALDH1A2	rs78423831	chr15	58394341	recessive	2.35686	0.0424787	1.37183
ALDH1A2	rs34794101	chr15	58398179	recessive	2.35686	0.0424787	1.37183
ALDH1A2	rs12916161	chr15	58398880	recessive	2.35686	0.0424787	1.37183
ALDH1A2	rs55995747	chr15	58497331	recessive	1.85876	0.0244178	1.61229
SH2B1	rs7187333	chr16	28854595	additive	0.845438	0.00468112	2.32965
SH2B1	rs7187333	chr16	28854595	dominant	1.14764	0.0424787	1.37183
SH2B1	rs7187333	chr16	28854595	recessive	1.37262	0.0424787	1.37183
SH2B1	rs12446589	chr16	28859641	additive	0.845438	0.00468112	2.32965
SH2B1	rs12446589	chr16	28859641	dominant	1.14764	0.0424787	1.37183
SH2B1	rs12446589	chr16	28859641	recessive	1.37262	0.0424787	1.37183
SH2B1	rs62037366	chr16	28860336	additive	0.845438	0.00468112	2.32965
SH2B1	rs62037366	chr16	28860336	dominant	1.14764	0.0424787	1.37183
SH2B1	rs62037366	chr16	28860336	recessive	1.37262	0.0424787	1.37183
SH2B1	rs7499337	chr16	28861033	additive	0.845438	0.00468112	2.32965
SH2B1	rs7499337	chr16	28861033	dominant	1.14764	0.0424787	1.37183
SH2B1	rs7499337	chr16	28861033	recessive	1.37262	0.0424787	1.37183
SH2B1	rs62037367	chr16	28863226	additive	0.852503	0.00468112	2.32965
SH2B1	rs62037367	chr16	28863226	recessive	1.39584	0.0244178	1.61229
SH2B1	rs7198606	chr16	28863801	additive	0.852503	0.00468112	2.32965
SH2B1	rs7198606	chr16	28863801	recessive	1.39584	0.0244178	1.61229
SH2B1	rs7193733	chr16	28864161	additive	0.852503	0.00468112	2.32965
SH2B1	rs7193733	chr16	28864161	recessive	1.39584	0.0244178	1.61229
SH2B1	rs11863370	chr16	28868163	additive	0.852503	0.00468112	2.32965
SH2B1	rs11863370	chr16	28868163	recessive	1.39584	0.0244178	1.61229
SH2B1	rs8055982	chr16	28869881	additive	0.852503	0.00468112	2.32965
SH2B1	rs8055982	chr16	28869881	recessive	1.39584	0.0244178	1.61229
SH2B1	rs7498603	chr16	28871103	additive	0.852503	0.00468112	2.32965
SH2B1	rs7498603	chr16	28871103	recessive	1.39584	0.0244178	1.61229
SH2B1	rs7498665	chr16	28871920	additive	0.852503	0.00468112	2.32965
SH2B1	rs7498665	chr16	28871920	recessive	1.39584	0.0244178	1.61229
SH2B1	rs62037369	chr16	28872520	additive	0.845438	0.00468112	2.32965
SH2B1	rs62037369	chr16	28872520	dominant	1.14764	0.0424787	1.37183
SH2B1	rs62037369	chr16	28872520	recessive	1.37262	0.0424787	1.37183
ATP2A1	rs11645143	chr16	28882088	additive	0.836786	0.00468112	2.32965
ATP2A1	rs11645143	chr16	28882088	recessive	1.39584	0.0244178	1.61229
ATP2A1	rs11645143	chr16	28882088	dominant	1.16648	0.0406779	1.39064
ATP2A1	rs11641216	chr16	28882211	additive	0.852503	0.00468112	2.32965
ATP2A1	rs11641216	chr16	28882211	recessive	1.39584	0.0244178	1.61229
ATP2A1	rs7498555	chr16	28882250	additive	0.845438	0.00468112	2.32965
ATP2A1	rs7498555	chr16	28882250	dominant	1.14764	0.0424787	1.37183
ATP2A1	rs7498555	chr16	28882250	recessive	1.37262	0.0424787	1.37183
ATP2A1	rs8061590	chr16	28883809	additive	0.852503	0.00468112	2.32965
ATP2A1	rs8061590	chr16	28883809	recessive	1.39584	0.0244178	1.61229
ATP2A1	rs11642449	chr16	28884694	additive	0.852503	0.00468112	2.32965
ATP2A1	rs11642449	chr16	28884694	recessive	1.39584	0.0244178	1.61229
ATP2A1	rs8056890	chr16	28886131	additive	0.852503	0.00468112	2.32965
ATP2A1	rs8056890	chr16	28886131	recessive	1.39584	0.0244178	1.61229
ATP2A1	rs9931989	chr16	28894763	additive	0.819234	0.00560404	2.2515
ATP2A1	rs9931989	chr16	28894763	recessive	1.39584	0.0244178	1.61229
ATP2A1	rs8046545	chr16	28903896	additive	0.845438	0.00468112	2.32965
ATP2A1	rs8046545	chr16	28903896	dominant	1.14764	0.0424787	1.37183
ATP2A1	rs8046545	chr16	28903896	recessive	1.37262	0.0424787	1.37183
RABEP2	rs7188071	chr16	28906323	additive	0.819234	0.00560404	2.2515
RABEP2	rs7188071	chr16	28906323	recessive	1.39584	0.0244178	1.61229
RABEP2	rs7206214	chr16	28908020	additive	0.845438	0.00468112	2.32965
RABEP2	rs7206214	chr16	28908020	dominant	1.14764	0.0424787	1.37183
RABEP2	rs7206214	chr16	28908020	recessive	1.37262	0.0424787	1.37183
RABEP2	rs7184597	chr16	28910488	additive	0.845438	0.00468112	2.32965
RABEP2	rs7184597	chr16	28910488	dominant	1.14764	0.0424787	1.37183
RABEP2	rs7184597	chr16	28910488	recessive	1.37262	0.0424787	1.37183
RABEP2	rs9708958	chr16	28911422	additive	0.845438	0.00468112	2.32965
RABEP2	rs9708958	chr16	28911422	dominant	1.14764	0.0424787	1.37183
RABEP2	rs9708958	chr16	28911422	recessive	1.37262	0.0424787	1.37183
RABEP2	rs3924376	chr16	28914657	additive	0.845438	0.00468112	2.32965
RABEP2	rs3924376	chr16	28914657	dominant	1.14764	0.0424787	1.37183
RABEP2	rs3924376	chr16	28914657	recessive	1.37262	0.0424787	1.37183
RABEP2	rs2904880	chr16	28933075	additive	0.845438	0.00468112	2.32965
RABEP2	rs2904880	chr16	28933075	dominant	1.14764	0.0424787	1.37183
RABEP2	rs2904880	chr16	28933075	recessive	1.37262	0.0424787	1.37183
SPNS1	rs8045689	chr16	28976948	additive	0.776103	0.0218685	1.66018
SPNS1	rs8045689	chr16	28976948	recessive	1.37262	0.0424787	1.37183
SPNS1	rs7187575	chr16	28978780	additive	0.776103	0.0218685	1.66018
SPNS1	rs7187575	chr16	28978780	recessive	1.37262	0.0424787	1.37183
SPNS1	rs6565300	chr16	28981728	additive	0.776103	0.0218685	1.66018
SPNS1	rs6565300	chr16	28981728	recessive	1.37262	0.0424787	1.37183
SPNS1	rs7140	chr16	28984436	additive	0.776103	0.0218685	1.66018
SPNS1	rs7140	chr16	28984436	recessive	1.37262	0.0424787	1.37183

[truncated: 5 more sheets: Table S11, Table S12, Table S13, Table S14, Table S15]
